# Supplementary material for: Relative Effect of Extracorporeal Shockwave Therapy Alone or in Combination with Noninjective Treatments on Pain and Physical Function in Knee Osteoarthritis: A Network Meta-Analysis of Randomized Controlled Trials
Source: MDPI journal article supplement (doi:10.3390/biomedicines10020306), 2022-01-28
Supplement: s1 [file s1]

## Supplementary materials

**Table S1.** Database search strategies.

| Data base                                      | Search terms for query                                                                                                |
|------------------------------------------------|-----------------------------------------------------------------------------------------------------------------------|
| <b>Pubmed</b>                                  |                                                                                                                       |
| #1                                             | ((shockwave therapy) OR shock wave therapy) OR extracorporeal shockwave therapy) OR extracorporeal shock wave therapy |
| #2                                             | Osteoarthritis                                                                                                        |
| #3                                             | Gonarthrititis                                                                                                        |
| #4                                             | Degenerative cartilage disease                                                                                        |
| #5                                             | ((#2) OR #3) OR #4                                                                                                    |
| #6                                             | Randomized control trial                                                                                              |
| #7                                             | #1 AND #5 AND #6                                                                                                      |
| <b>Physiotherapy Evidence Database (PEDro)</b> |                                                                                                                       |
|                                                | Body part: lower leg or knee                                                                                          |
|                                                | Method: clinical trial                                                                                                |
|                                                | Abstract & Title:                                                                                                     |
| #1                                             | extracorporeal shock wave therapy                                                                                     |
| #2                                             | extracorporeal shockwave therapy                                                                                      |
| #3                                             | shock wave therapy                                                                                                    |
| #4                                             | shockwave therapy                                                                                                     |
| #5                                             | shock wave                                                                                                            |
| #6                                             | shockwave                                                                                                             |
| #7                                             | Osteoarthritis                                                                                                        |
| #8                                             | Gonarthrititis                                                                                                        |
| #9                                             | Degenerative cartilage disease                                                                                        |
| <b>Cochrane Library Database</b>               |                                                                                                                       |
| #1                                             | (shock wave) OR (shockwave)                                                                                           |
| #2                                             | Osteoarthritis                                                                                                        |
| #3                                             | Gonarthrititis                                                                                                        |
| #4                                             | Degenerative cartilage disease                                                                                        |
| #5                                             | (knee soft tissue disorder) or (knee musculoskeletal disorder)                                                        |
| #6                                             | #2 OR #3 OR #4 OR #5                                                                                                  |
| #7                                             | #1 AND #6                                                                                                             |

(continued)

**Table S1. (continued)**

| <b>Data base</b>                                    | <b>Search terms for query</b>                                                                              |
|-----------------------------------------------------|------------------------------------------------------------------------------------------------------------|
| <b>Excerpta Medica dataBASE (EMBASE)</b>            |                                                                                                            |
| #1                                                  | extracorporeal shock wave therapy                                                                          |
| #2                                                  | extracorporeal shockwave therapy                                                                           |
| #3                                                  | shock wave therapy                                                                                         |
| #4                                                  | shockwave therapy                                                                                          |
| #5                                                  | #1 OR #2 OR #3 OR #4                                                                                       |
| #6                                                  | 'osteoarthritis'/exp OR osteoarthritis                                                                     |
| #7                                                  | Gonarthrititis                                                                                             |
| #8                                                  | degenerative AND cartilage AND disease                                                                     |
| #9                                                  | knee AND joint AND musculoskeletal AND disorder                                                            |
| #10                                                 | knee AND joint AND soft AND tissue AND disorder                                                            |
| #11                                                 | #6 OR #7 OR #8 OR #9 OR #10                                                                                |
| #12                                                 | #5 AND #11                                                                                                 |
| #13                                                 | (#12) AND [randomized controlled trial]/lim AND ([article]/lim OR [article in press]/lim) AND [humans]/lim |
| <b>China knowledge resource integrated database</b> |                                                                                                            |
| #1                                                  | (shock wave therapy) OR (shock wave therapy)                                                               |
| #2                                                  | (knee) AND (osteoarthritis)                                                                                |
| #3                                                  | (knee) AND (Gonarthrititis)                                                                                |
| #4                                                  | (knee) AND (Degenerative cartilage disease)                                                                |
| #6                                                  | (knee soft tissue disorder) or (knee musculoskeletal disorder)                                             |
| #7                                                  | #2 OR #3 OR #4 OR #5 OR #6                                                                                 |
| #8                                                  | #1 AND #7                                                                                                  |
| <b>Google Scholar</b>                               |                                                                                                            |
| #1                                                  | allintitle: extracorporeal shock wave therapy osteoarthritis                                               |
| #2                                                  | allintitle: extracorporeal shockwave therapy Gonarthrititis                                                |
| #3                                                  | allintitle: extracorporeal shock wave therapy degenerative cartilage disease                               |

**Table S2.** Characteristics of the included studies.

| Study (year)<br>[Reference] | Country<br>(area) | Study arm                   | Age (years)<br>Mean (SD or<br>range) | BMI (kg/m <sup>2</sup> ) | Sex (F/M)           | <i>N</i> | Involved side,<br>unilateral/bilateral | K-L<br>grade | Duration of<br>symptoms<br>(months) Mean<br>(SD, range) | Co-intervention     | All cause<br>withdraws (n) | Compliance<br>rate | Measured time<br>point (week) | Main outcome<br>measures |
|-----------------------------|-------------------|-----------------------------|--------------------------------------|--------------------------|---------------------|----------|----------------------------------------|--------------|---------------------------------------------------------|---------------------|----------------------------|--------------------|-------------------------------|--------------------------|
| Aletaiбиеke, 2016 [1]       | China<br>(Asia)   | EG: ESWT                    | 65.0 (45–85)                         | 31.2 (5.2)               | 22/21               | 43       | 15/0                                   | I, II        | NR                                                      | None                | 0                          | 100.00%            | 0, 12                         | VAS; WOMAC               |
|                             |                   | CG: PLA                     | 64.5 (45–89)                         | 28.9 (3.7)               | 25/18               | 43       | 15/0                                   |              |                                                         |                     |                            |                    |                               |                          |
| Ammar 2018 [2]              | Egypt<br>(Africa) | EG: ESWT                    | 40.1 (5.5)                           | 28.8 (5.2)               | 11/4                | 15       | NR                                     | NR           | 17.2 (11.4)                                             | MSE + CPTM (IFC)    | 3                          | 80.00%             | 0, 4                          | VAS; WOMAC               |
|                             |                   | CG: Con                     | 43.6 (7.7)                           | 29.2 (2.5)               | 6/9                 | 15       |                                        |              |                                                         |                     | 2                          | 86.67%             |                               |                          |
| Cai 2021 [3]                | China<br>(Asia)   | EG: ESWT                    | 62.4 (2.2)                           | NR                       | 16/28               | 44       | 44/0                                   | II-IV        | 26.2 (4.0)                                              | None                | 0                          | 100.00%            | 0, 6                          | WOMAC                    |
|                             |                   | CG: Con                     | 62.3 (2.2)                           |                          | 15/29               | 44       | 44/0                                   |              | 25.9 (3.8)                                              |                     | 0                          | 100.00%            |                               |                          |
| Chang 2021 [4]              | China<br>(Asia)   | EG 2: Acupoint-ESWT         | 59.7 (5.3)                           | NR                       | 30/15               | 45       | NR                                     | I-III        | 26.6 (5.2)                                              | None                | 0                          | 100.00%            | 0, 2, 4                       | VAS; WOMAC               |
|                             |                   | EG 1: Acupoint-ESWT<br>+TCM | 59.0 (5.7)                           |                          | 29/16               | 45       |                                        |              | 26.3 (3.6)                                              |                     | 0                          | 100.00%            |                               |                          |
| Chen 2014 [5]               | Taiwan<br>(Asia)  | EG: ESWT + MSE              | 63.0 (7.4) <sup>c</sup>              | NR                       | 102/28 <sup>c</sup> | 30       | 0/30                                   | III          | 10–144 <sup>c</sup>                                     | None                | 2                          | 93.33%             | 0, 8, 24                      | VAS;<br>Lequesne’s index |
|                             |                   | CG 1: USD + MSE             |                                      |                          |                     | 30       | 0/30                                   |              |                                                         |                     | 2                          | 93.33%             |                               |                          |
|                             |                   | CG 2: MSE                   |                                      |                          |                     | 30       | 0/30                                   |              |                                                         |                     | 3                          | 90.00%             |                               |                          |
|                             |                   | CG 3: Con                   |                                      |                          |                     | 30       | 0/30                                   |              |                                                         |                     | 3                          | 90.00%             |                               |                          |
| Cho 2016 [6]                | Korea<br>(Asia)   | EG: ESWT                    | 75.5 (7.7)                           | 22.9 (3.6)               | 1/8                 | 9        | 2/7                                    | ≥ 1          | NR                                                      | None                | 0                          | 100.00%            | 0, 4                          | VAS; FIM                 |
|                             |                   | CG: PLA                     | 72.7 (5.9)                           | 23.5 (4.3)               | 2/7                 | 9        | 1/8                                    | ≥ 1          |                                                         |                     | 0                          | 100.00%            |                               |                          |
| Cui 2015 [7]                | China<br>(Asia)   | EG 1: ESWT + TCM            | 56.8 (13.1) <sup>c</sup>             | NR                       | 45/30 <sup>c</sup>  | 25       | 52/33 <sup>c</sup>                     | NR           | 63.6 (21.6) <sup>c</sup>                                | None                | 0                          | 100.00%            | 0, 1, 2, 4                    | Lequesne’s index         |
|                             |                   | EG 2: ESWT                  |                                      |                          |                     | 25       |                                        |              |                                                         |                     | 0                          | 100.00%            |                               |                          |
|                             |                   | CG: TCM                     |                                      |                          |                     | 25       |                                        |              |                                                         |                     | 0                          | 100.00%            |                               |                          |
| Dou 2016 [8]                | China<br>(Asia)   | EG: ESWT                    | 51.5 (8.9)                           | 23.1 (3.2)               | 50/13               | 63       | NR                                     | I, II        | 7.84 (11.31)                                            | None                | 2                          | 96.83%             | 0, 1, 2, 3, 4, 5              | WOMAC                    |
|                             |                   | CG: USD                     | 52.1 (9.2)                           | 22.7 (3.2)               | 44/14               | 58       |                                        |              | 8.23 (12.27)                                            |                     | 0                          | 100.00%            |                               |                          |
| Ediz 2018 [9]               | Turkey<br>(Asia)  | EG 1: ESWT                  | 70.5 (4.2)                           | 26.9 (4.7)               | 24/14               | 38       | 0/38                                   | II, III      | 40.72 (15.14)                                           | TENS                | 2                          | 95.00%             | 0, 24, 52                     | VAS; WOMAC               |
|                             |                   | EG 2: PLA (LI ESWT)         | 69.7 (4.5)                           | 26.9 (4.9)               | 22/13               | 35       | 0/35                                   |              | 39.43 (12.34)                                           |                     | 5                          | 87.50%             |                               |                          |
| Eftekarsadat<br>2020 [10]   | Iran<br>(Asia)    | EG: ESWT                    | 58.0 (6.0)                           | NR                       | 25/0                | 25       | NR                                     | II, III      | NR                                                      | MSE                 | 2                          | 92.00%             | 0, 3, 7                       | VAS<br>WOMAC             |
|                             |                   | CG 1: USD                   | 55.8 (7.2)                           |                          | 23/2                | 25       |                                        |              |                                                         |                     | 3                          | 88.00%             |                               |                          |
|                             |                   | CG 2: Con                   | 58.2 (7.2)                           |                          | 22/3                | 25       |                                        |              |                                                         |                     | 3                          | 88.00%             |                               |                          |
| Elerian 2016 [11]           | Egypt<br>(Africa) | EG: ESWT                    | 51.0 (3.5) <sup>c</sup>              | 86% ≥ 25.0               | 50/10 <sup>c</sup>  | 20       | 0/20                                   | II, III      | NR                                                      | None                | 0                          | 100.00%            | 0, 4, 8, 24                   | VAS<br>WOMAC             |
|                             |                   | CG 1: IAI                   |                                      |                          |                     | 20       | 0/20                                   |              |                                                         |                     | 0                          | 100.00%            |                               |                          |
|                             |                   | CG 2: PLA                   |                                      |                          |                     | 20       | 0/20                                   |              |                                                         |                     | 0                          | 100.00%            |                               |                          |
| Elgendy 2020 [12]           | Egypt<br>(Africa) | EG: ESWT                    | 48.7 (8.6)                           | 31.3 (2.3)               | NR                  | 15       | 15/0                                   | II, III      | NR                                                      | MSE + CPTM<br>(USD) | 0                          | 100.00%            | 0, 4                          | VAS<br>WOMAC             |
|                             |                   | CG 1: IAI                   | 49.2 (9.2)                           | 31.5 (2.0)               |                     | 15       | 15/0                                   |              |                                                         |                     | 0                          | 100.00%            |                               |                          |
|                             |                   | CG 2: Con                   | 55.1 (6.7)                           | 30.8 (2.5)               |                     | 15       | 15/0                                   |              |                                                         |                     | 0                          | 100.00%            |                               |                          |

*To be continued.*

**Table S2.** Continued.

| Study (year)<br>[Reference] | Country<br>(area)            | Study arm                    | Age (years)<br>Mean (SD or<br>range) | BMI (kg/m <sup>2</sup> ) | Sex (F/M)           | <i>N</i> | Involved side,<br>unilateral/bilateral | K-L<br>grade | Duration of<br>symptoms<br>(months) Mean<br>(SD, range) | Co-intervention  | All cause<br>withdraws (n) | Compliance<br>rate | Measured time<br>point (week) | Main outcome<br>measures      |
|-----------------------------|------------------------------|------------------------------|--------------------------------------|--------------------------|---------------------|----------|----------------------------------------|--------------|---------------------------------------------------------|------------------|----------------------------|--------------------|-------------------------------|-------------------------------|
| El-Sakka 2019 [13]          | Egypt<br>(Africa)            | EG: ESWT                     | 53.5 (7.8)                           | 35.3 (5.3)               | 9/6                 | 15       | 15/0                                   | NR           | 35.3 (30.9)                                             | MSE              | 0                          | 100.00%            | 0, 4, 8                       | VAS; WOMAC                    |
| Feng 2019 [14]              | China<br>(Asia)              | CG: USD                      | 51.5 (5.7)                           | 36.4 (3.1)               | 12/3                | 15       | 15/0                                   |              | 57.9 (42.1)                                             |                  | 0                          | 100.00%            |                               |                               |
|                             |                              | EG 1: ESWT + TCM             | 54.5 (3.6)                           | NR                       | 44/0                | 44       | NR                                     | NR           | 28.8 (6.0)                                              | None             | 0                          | 100.00%            | 0, 4                          | VAS; WOMAC                    |
| Gunaydin 2020 [15]          | Turkey<br>(Asia)             | EG 2: ESWT                   | 57.2 (3.4)                           |                          | 44/0                | 44       |                                        |              | 30.0 (7.2)                                              |                  | 0                          | 100.00%            |                               |                               |
|                             |                              | EG: ESWT                     | 58.8 (6.2) <sup>c</sup>              | 28.8 (4.7) <sup>c</sup>  | 8/0                 | 8        | 48/48 <sup>c</sup>                     | I-III        | ≥ 6.0                                                   | MSE              | 10                         | 44.44%             | 0, 6, 12                      | VAS; KOOS                     |
|                             |                              | CG 1: KT                     |                                      |                          | 20/0                | 20       |                                        |              |                                                         |                  | 2                          | 90.91%             |                               |                               |
| Guo 2019 [16]               | China<br>(Asia)              | CG 2: Con                    |                                      |                          | 20/0                | 20       |                                        |              |                                                         |                  | 0                          | 100.00%            |                               |                               |
|                             |                              | EG: ESWT                     | 59.0 (8.3)                           | NR                       | 27/16               | 43       | 43/0                                   | II, III      | 50.5 (39.0)                                             | TCM              | 0                          | 100.00%            | 0, 1.5                        | VAS                           |
|                             |                              | CG: Con                      | 59.0 (8.5)                           |                          | 25/15               | 40       | 40/0                                   |              | 28.8 (6.0)                                              |                  | 3                          | 93.02%             |                               |                               |
| Hammam 2020 [17]            | Egypt<br>(Africa)            | EG 1: HI ESWT                | 50.4 (3.4)                           | 30.7 (3.5)               | 9/6                 | 15       | 15/0                                   | II           | ≥ 3.0                                                   | MSE              | 0                          | 100.00%            | 0, 4                          | VAS                           |
|                             |                              | EG 2: LI ESWT                | 49.9 (2.6)                           | 31.0 (2.4)               | 10/5                | 15       | 15/0                                   |              |                                                         |                  | 0                          | 100.00%            |                               | KOOS                          |
|                             |                              | CG: PLA                      | 49.7 (3.1)                           | 31.1 (3.0)               | 7/8                 | 15       | 15/0                                   |              |                                                         |                  | 0                          | 100.00%            |                               |                               |
| He 2014 [18]                | China<br>(Asia)              | EG: ESWT                     | 50.7 (9.1)                           | NR                       | 16/8                | 24       | 17/7                                   | NR           | 6.1 (6.4)                                               | CPTM             | 0                          | 100.00%            | 0, 4                          | KSS                           |
|                             |                              | CG: Con                      | 52.3 (10.3)                          |                          | 13/11               | 24       | 20/4                                   |              | 6.1 (6.4)                                               |                  | 0                          | 100.00%            |                               |                               |
| He 2016 [19]                | China<br>(Asia)              | EG: ESWT                     | 65.0 <sup>c</sup>                    | NR                       | 106/35 <sup>c</sup> | 68       | NR                                     | NR           | ≥ 1.0                                                   | None             | 0                          | 100.00%            | 0, 6, 14, 26                  | VAS                           |
|                             |                              | CG: Con                      |                                      |                          |                     | 73       |                                        |              |                                                         |                  | 0                          | 100.00%            |                               | Lysholm scale                 |
| He 2021 [20]                | China                        | EG: ESWT                     | 53.0 (5.0)                           | 22.3 (2.0)               | 30/31               | 61       | NR                                     | II, III      | 51.0 (5.0)                                              | PM (NSAID)       | 0                          | 100.00%            | 0, 6                          | WOMAC;<br>inflammation factor |
| Imamura 2017 [21]           | (Asia)<br>Brazil<br>(Europe) | CG: Con                      | 53.0 (5.0)                           | 22.3 (2.0)               | 30/31               | 61       |                                        |              | 51.0 (5.0)                                              |                  | 0                          | 100.00%            |                               | Lequesne's index              |
|                             |                              | EG: ESWT                     | 70.0 (6.5)                           | NR                       | 52/0                | 52       | 52/0                                   | II-IV        | 92.4 (77.4)                                             | None             | 3                          | 94.23%             | 0, 4, 12                      | VAS; WOMAC                    |
|                             |                              | CG: PLA                      | 72.4 (6.5)                           |                          | 53/0                | 53       | 53/0                                   |              | 113.7 (99.0)                                            |                  | 2                          | 96.23%             |                               |                               |
| Ji 2021 [22]                | China<br>(Asia)              | EG: Acupoint-ESWT            | 69.9 (5.3)                           | NR                       | 32/22               | 54       | 54/0                                   | NR           | 13.5 (4.4)                                              | None             | 0                          | 100.00%            | 0, 12, 36                     | VAS; Lysholm scale            |
|                             |                              | CG: PM (NSAID)               | 70.4 (6.7)                           |                          | 34/20               | 54       | 54/0                                   |              | 15.0 (3.9)                                              |                  | 0                          | 100.00%            |                               | inflammation factor           |
| Jiang 2017 [23]             | China                        | EG 1: ESWT +<br>Mobilization | 56.2 (4.9)                           | NR                       | 13/12               | 25       | NR                                     | II, III      | ≥ 6.0                                                   | Regular medicine | 0                          | 100.00%            | 0, 4                          | WOMAC                         |
| Kim 2015 [24]               | (Asia)                       | EG 2: ESWT                   | 59.1 (3.1)                           |                          | 14/11               | 25       |                                        |              |                                                         |                  | 0                          | 100.00%            |                               |                               |
|                             |                              | CG: Mobilization             | 57.3 (4.7)                           |                          | 12/13               | 25       |                                        |              |                                                         |                  | 0                          | 100.00%            |                               |                               |
|                             |                              | EG 1: HI ESWT                | 63.5 (5.4)                           | 24.2 (2.1)               | 3/27                | 30       | 30/0                                   | II, III      | 16.7 (4.7)                                              | None             | 0                          | 100.00%            | 0, 1, 4, 12                   | VAS                           |
|                             |                              | EG 2: LI ESWT                | 65.1 (6.3)                           | 23.8 (1.7)               | 4/26                | 30       | 30/0                                   |              | 19.3 (5.2)                                              |                  | 0                          | 100.00%            |                               | WOMAC<br>Lequesne's index     |

*To be continued.*

Table S2. Continued.

| Study (year)<br>[Reference] | Country<br>(area)  | Study arm                       | Age (years)<br>Mean (SD or<br>range) | BMI (kg/m <sup>2</sup> ) | Sex (F/M) | N   | Involved side,<br>unilateral/bilateral | K-L<br>grade | Duration of<br>symptoms<br>(months) Mean<br>(SD, range) | Co-intervention | All cause<br>withdraws (n) | Compliance<br>rate | Measured time<br>point (week) | Main outcome<br>measures |
|-----------------------------|--------------------|---------------------------------|--------------------------------------|--------------------------|-----------|-----|----------------------------------------|--------------|---------------------------------------------------------|-----------------|----------------------------|--------------------|-------------------------------|--------------------------|
| Kuang 2017 [25]             | China<br>(Asia)    | EG 1: ESWT + TCM                | 65.8 (61-75)                         | NR                       | 19/11     | 30  | NR                                     | I, II        | 88.8 (9.6-228)                                          | None            | 0                          | 100.00%            | 0, 5                          | VAS; WOMAC               |
|                             |                    | EG 2: ESWT                      | 66.4 (60-74)                         |                          | 18/12     | 30  |                                        |              | 91.2 (6.0-240)                                          |                 | 0                          | 100.00%            |                               |                          |
| Li 2018 [26]                | China<br>(Asia)    | EG: ESWT + TCM                  | 51.8 (11.7)                          | NR                       | 99/68     | 167 | NR                                     | I-III        | 57.0 (50.9)                                             | None            | 0                          | 100.00%            | 0, 5, 12, 24                  | VAS; WOMAC               |
|                             |                    | CG: PM (NSAID)                  | 52.4 (12.3)                          |                          | 108/59    | 167 |                                        |              | 49.8 (46.3)                                             |                 | 0                          | 100.00%            |                               |                          |
| Li 2015 [27]                | China<br>(Asia)    | EG 1: HF-ESWT                   | 53 (46–69)                           | NR                       | 19/11     | 30  | NR                                     | I-III        | 61.2 (36–84)                                            | None            | 0                          | 100.00%            | 0, 2                          | VAS                      |
|                             |                    | EG 2: MF-ESWT                   | 55 (48–70)                           |                          | 17/13     | 30  |                                        |              | 70.8 (36–108)                                           |                 | 0                          | 100.00%            |                               |                          |
|                             |                    | EG 3: LF-ESWT                   | 52 (45–70)                           |                          | 18/12     | 30  |                                        |              | 62.4 (36–96)                                            |                 | 0                          | 100.00%            |                               |                          |
|                             |                    | CG: Conventional<br>acupuncture | 54 (46–69)                           |                          | 18/12     | 30  |                                        |              | 61.2 (36–84)                                            |                 | 0                          | 100.00%            |                               |                          |
| Li MZ 2020 [28]             | China<br>(Asia)    | EG: ESWT                        | 57.4 (9.1)                           | 23.7 (2.8)               | 17/1      | 18  | NR                                     | II, III      | ≥ 6.0                                                   | MSE             | 0                          | 100.00%            | 0, 4, 16                      | VAS; WOMAC               |
|                             |                    | CG: PLA                         | 58.7 (13.0)                          | 24.5 (3.2)               | 16/2      | 18  |                                        |              |                                                         |                 | 0                          | 100.00%            |                               |                          |
| Li RX 2021 [29]             | China<br>(Asia)    | EG: ESWT                        | NR                                   | NR                       | NR        | 35  | NR                                     | NR           | NR                                                      | None            | 0                          | 100.00%            | 0, 4                          | VAS; WOMAC               |
|                             |                    | CG: MSE                         |                                      |                          |           | 35  |                                        |              |                                                         |                 | 0                          | 100.00%            |                               | Lequesne’s index         |
| Li 2017 [30]                | China<br>(Asia)    | EG: ESWT                        | 64.3 (11.8)                          | 27.3 (2.5)               | 45/0      | 45  | 42/3                                   | II, III      | 2.0-24.0 <sup>c</sup>                                   | None            | 3                          | 93.33%             | 0, 8, 16                      | VAS; WOMAC               |
|                             |                    | CG: PLA + PM (NSAID)            | 65.4 (12.7)                          | 26.2 (2.8)               | 45/0      | 45  | 42/3                                   |              |                                                         |                 | 2                          | 95.56%             |                               | Lequesne’s index         |
| Liu 2020 [31]               | China<br>(Asia)    | EG 1: HI ESWT                   | 58.6 (6.6)                           | 22.9 (1.3)               | 14/12     | 26  | 22/4                                   | I-III        | 61.4 (32.9)                                             | None            | 0                          | 100.00%            | 0, 8, 56                      | VAS; WOMAC               |
|                             |                    | EG 2: MI ESWT                   | 58.5 (5.3)                           | 22.5 (1.4)               | 37/38     | 75  | 60/15                                  |              | 62.7 (32.4)                                             |                 | 0                          | 100.00%            |                               |                          |
|                             |                    | EG 3: LI ESWT                   | 58.2 (5.7)                           | 22.6 (1.3)               | 14/12     | 26  | 22/4                                   |              | 62.0 (31.8)                                             |                 | 0                          | 100.00%            |                               | Lysholm scale            |
| Liu MY 2017 [32]            | China<br>(Asia)    | EG: ESWT                        | 68.5 (7.6)                           | 26.4 (2.5)               | 65/14     | 79  | 79/0                                   | II, III      | 25.8 (3.5)                                              | None            | 0                          | 100.00%            | 0, 8, 16                      | VAS; WOMAC               |
|                             |                    | CG: PLA + PM (NSAID)            | 66.7 (7.4)                           | 25.8 (3.1)               | 61/18     | 79  | 79/0                                   |              | 26.8 (3.6)                                              |                 | 0                          | 100.00%            |                               | Inflammation factor      |
| Liu WD 2017 [33]            | China<br>(Asia)    | EG: ESWT                        | 59.1 (5.3)                           | NR                       | 17/13     | 30  | NR                                     | I-III        | 25.2 (7.1)                                              | None            | 0                          | 100.00%            | 0, 6                          | WOMAC                    |
|                             |                    | CG: Acupotomy                   | 58.8 (5.1)                           |                          | 17/11     | 28  |                                        |              | 24.7 (6.2)                                              |                 | 2                          | 93.33%             |                               |                          |
| Liu 2016b [34]              | China<br>(Asia)    | EG: ESWT                        | 59.6 (8.2)                           | 26.8 (3.0)               | 33/0      | 33  | 33/0                                   | II, III      | 58.8 (39.6)                                             | None            | 0                          | 100.00%            | 0, 8                          | VAS; WOMAC               |
|                             |                    | CG: GAS                         | 58.7 (6.4)                           | 27.4 (2.6)               | 32/0      | 32  | 32/0                                   |              | 61.2 (40.8)                                             |                 | 0                          | 100.00%            |                               |                          |
| Liu YW 2018 [35]            | China<br>(Asia)    | EG: ESWT + TCM                  | 51.8 (7.2)                           | NR                       | 67/13c    | 40  | 38/42 <sup>c</sup>                     | NR           | 21.4 (9.4)                                              | None            | 0                          | 100.00%            | 0, 3, 7                       | WOMAC                    |
|                             |                    | CG: PM (NSAID)                  | 52.9 (6.6)                           |                          |           | 40  |                                        |              | 20.9 (8.9)                                              |                 | 0                          | 100.00%            |                               | HSS                      |
| Lizis 2017a [36]            | Poland<br>(Europe) | EG: ESWT                        | 63.5 (8.0)                           | 24.9 (1.9)               | 13/7      | 20  | 20/0                                   | NR           | 108 (36)                                                | Glucocorticoids | 0                          | 100.00%            | 0, 5                          | WOMAC                    |
|                             |                    | CG: MSE                         | 65.0 (8.4)                           | 24.1 (1.5)               | 9/11      | 20  | 20/0                                   |              | 138 (72)                                                |                 | 0                          | 100.00%            |                               |                          |
| Lizis 2017b [37]            | Poland<br>(Europe) | EG: ESWT                        | 61.0 (9.0)                           | 23.2 (1.3)               | 30/0      | 30  | 0/30                                   | NR           | 96 (48)                                                 | None            | 0                          | 100.00%            | 0, 5                          | VAS; WOMAC               |
|                             |                    | CG: MSE                         | 59.0 (9.0)                           | 23.3 (1.3)               | 30/0      | 30  | 0/30                                   |              | 84 (48)                                                 |                 | 0                          | 100.00%            |                               |                          |

To be continued.

**Table S2.** Continued.

| Study (year)<br>[Reference] | Country<br>(area)  | Study arm            | Age (years)<br>Mean (SD or<br>range) | BMI (kg/m <sup>2</sup> ) | Sex (F/M) | <i>N</i> | Involved side,<br>unilateral/bilateral | K-L<br>grade | Duration of<br>symptoms<br>(months) Mean<br>(SD, range) | Co-intervention  | All cause<br>withdraws (n) | Compliance<br>rate | Measured time<br>point (week) | Main outcome<br>measures |
|-----------------------------|--------------------|----------------------|--------------------------------------|--------------------------|-----------|----------|----------------------------------------|--------------|---------------------------------------------------------|------------------|----------------------------|--------------------|-------------------------------|--------------------------|
| Lizis 2018 [38]             | Poland<br>(Europe) | EG: ESWT             | 59.8 (3.9)                           | 24.2 (0.7)               | 10/20     | 30       | 30/0                                   | ≥ 1          | 96 (24)                                                 | None             | 0                          | 100.00%            | 0, 5                          | VAS; KOOS                |
|                             |                    | CG: USD              | 60.7 (4.8)                           | 23.8 (0.7)               | 8/22      | 30       | 30/0                                   |              | 88.8 (28.8)                                             |                  | 0                          | 100.00%            |                               |                          |
| Ma 2020 [39]                | China<br>(Asia)    | EG: ESWT             | 58.4 (2.6)                           | NR                       | NR        | 38       | 38/0                                   | II, III      | 55.9 (13.8)                                             | TCM (fumigation) | 0                          | 100.00%            | 0, 2                          | VAS                      |
|                             |                    | CG: Con              | 58.4 (2.6)                           |                          |           | 38       | 38/0                                   |              | 54.1 (14.4)                                             |                  | 0                          | 100.00%            |                               |                          |
| Qin 2018 [40]               | China<br>(Asia)    | EG: ESWT             | 58.3 (10.3)                          | NR                       | 17/13     | 30       | NR                                     | NR           | 38.4 (7.2)                                              | None             | 0                          | 100.00%            | 0, 4                          | VAS                      |
|                             |                    | CG: Phonophoresis    | 56.2 (11.7)                          |                          | 19/11     | 30       |                                        |              | 46.8 (6.0)                                              |                  | 0                          | 100.00%            |                               |                          |
| Shen 2016 [41]              | China<br>(Asia)    | EG: ESWT             | 61.1 (8.8)                           | 22.8 (3.5) <sup>d</sup>  | 17/14     | 31       | 31/0                                   | II, III      | 56.3 (21.4)                                             | None             | 0                          | 100.00%            | 0, 4                          | VAS;                     |
|                             |                    | CG: CPTM + TCM       | 62.5 (8.3)                           | 23.3 (3.6) <sup>d</sup>  | 19/11     | 30       | 30/0                                   |              | 47.0 (19.9)                                             |                  | 0                          | 100.00%            |                               | Lysholm scale            |
| Shenouda 2013 [42]          | Egypt<br>(Africa)  | EG: ESWT             | 52.2 (5.4)                           | NR                       | NR        | 15       | 45/45 <sup>c</sup>                     | III, IV      | 88.0 (33.2)                                             | MSE              | 0                          | 100.00%            | 0, 4                          | VAS                      |
|                             |                    | CG 1: MWM            | 51.9 (6.5)                           |                          |           | 15       |                                        |              | 100.8 (29.6)                                            |                  | 0                          | 100.00%            |                               | WOMAC                    |
|                             |                    | CG 2: Con            | 50.1 (5.7)                           |                          |           | 15       |                                        |              | 92.8 (33.7)                                             |                  | 0                          | 100.00%            |                               |                          |
| Shi D 2020 [43]             | China<br>(Asia)    | EG: ESWT + TCM       | 59.6 (8.1)                           | NR                       | 18/12     | 30       | 30/0                                   | NR           | 39.4 (10.4)                                             | None             | 0                          | 100.00%            | 0, 4, 8, 16, 28               | VAS; WOMAC               |
|                             |                    | CG: GAS              | 56.8 (10.1)                          |                          | 21/9      | 30       | 30/0                                   |              | 40.1 (11.3)                                             |                  | 0                          | 100.00%            |                               |                          |
| Uysal 2020 [44]             | Turkey<br>(Asia)   | EG 1: ESWT           | 60.2 (6.3)                           | 30.6 (4.3)               | 42/10     | 52       | NR                                     | II, III      | 40.2 (21.9)                                             | MSE + CPTM       | 0                          | 100.00%            | 0, 4, 12                      | VAS; WOMAC               |
|                             |                    | EG 2: PLA (LI ESWT)  | 61.8 (6.0)                           | 30.8 (4.6)               | 43/9      | 52       |                                        |              | 46.8 (24.0)                                             | (TENS)           | 0                          | 100.00%            |                               | Lequesne's index         |
| Wang AH 2021 [45]           | China<br>(Asia)    | EG: ESWT             | 65.2 (5.4)                           | NR                       | 29/13     | 42       | NR                                     | I, II        | 19.4 (17.1)                                             | MSE              | 0                          | 100.00%            | 0, 4                          | JOA                      |
|                             |                    | CG: Con              | 58.4 (2.6)                           |                          | 30/11     | 41       |                                        |              | 18.2 (16.9)                                             |                  | 0                          | 100.00%            |                               |                          |
| Wang HR 2020 [46]           | China<br>(Asia)    | EG 1: ESWT + TCM     | 59.6 (9.5)                           | NR                       | 56/64     | 120      | 95/25                                  | I-III        | 59.6 (20.2)                                             | None             | 0                          | 100.00%            | 0, 2, 6, 12, 24               | VAS                      |
|                             |                    | EG 2: ESWT           | 58.3 (15.3)                          |                          | 61/59     | 120      | 88/32                                  |              | 56.0 (20.2)                                             |                  | 0                          | 100.00%            |                               | Lysholm scale            |
|                             |                    | CG: TCM              | 60.8 (10.5)                          |                          | 55/65     | 120      | 92/28                                  |              | 54.7 (19.2)                                             |                  | 0                          | 100.00%            |                               | Inflammation factor      |
| Wang 2016 [47]              | China<br>(Asia)    | EG: ESWT             | 63.5 (9.5)                           | NR                       | 19/21     | 40       | 19/21                                  | NR           | 106.8 (91.2)                                            | None             | 0                          | 100.00%            | 0, 8, 19, 32                  | WOMAC                    |
|                             |                    | CG: Manipulation     | 64.2 (9.6)                           |                          | 18/20     | 38       | 17/21                                  |              | 103.2 (92.4)                                            |                  | 0                          | 100.00%            |                               |                          |
| Wang TS 2020 [48]           | China<br>(Asia)    | EG: ESWT             | 63.5 (10.6)                          | 24.8 (2.3)               | 12/24     | 36       | NR                                     | NR           | 97.2 (42.0)                                             | None             | 3                          | 91.67%             | 0, 5, 10                      | VAS; WOMAC               |
|                             |                    | CG: PLA              | 64.3 (11.1)                          | 25.2 (2.4)               | 15/21     | 36       |                                        |              | 92.4 (45.6)                                             |                  | 5                          | 86.11%             |                               |                          |
| Wang YY 2020 [49]           | China<br>(Asia)    | EG 1: Acupoint-ESWT  | 80.3 (10.0)                          | NR                       | 17/22     | 39       | NR                                     | NR           | 136.8 (56.4)                                            | None             | 0                          | 100.00%            | 0, 4, 8                       | WOMAC                    |
|                             |                    | EG 2: ESWT           | 78.5 (10.9)                          |                          | 23/13     | 36       |                                        |              | 136.8 (52.8)                                            |                  | 0                          | 100.00%            |                               |                          |
| Wu 2014 [50]                | China<br>(Asia)    | EG: ESWT             | 59.7 (6.9)                           | 23.9 (1.8)               | 20/7      | 27       | 27/0                                   | II, III      | NR                                                      | None             | 2                          | 92.59%             | 0, 2, 6                       | VAS                      |
|                             |                    | CG: GAS + PM (NSAID) | 60.6 (8.5)                           | 23.8 (1.8)               | 20/6      | 26       | 26/0                                   |              |                                                         |                  | 5                          | 80.77%             |                               | KOOS                     |
| Xiao 2021 [51]              | China<br>(Asia)    | EG: ESWT             | 62.9 (8.9)                           | NR                       | 24/34     | 58       | NR                                     | I-III        | 46.7 (10.8)                                             | MSE              | 0                          | 100.00%            | 0, 4                          | Inflammation             |
|                             |                    | CG: Con              | 63.2 (8.8)                           |                          | 22/36     | 58       |                                        |              | 48.6 (11.2)                                             | PM (NSAID)       | 0                          | 100.00%            |                               | factor                   |

*To be continued.*

Table S2. Continued.

| Study (year)<br>[Reference] | Country<br>(area) | Study arm                        | Age (years)<br>Mean (SD or<br>range) | BMI (kg/m <sup>2</sup> ) | Sex (F/M) | N  | Involved side,<br>unilateral/bilateral | K-L<br>grade | Duration of<br>symptoms<br>(months) Mean<br>(SD, range) | Co-intervention          | All cause<br>withdraws (n) | Compliance<br>rate | Measured time<br>point (week) | Main outcome<br>measures                 |
|-----------------------------|-------------------|----------------------------------|--------------------------------------|--------------------------|-----------|----|----------------------------------------|--------------|---------------------------------------------------------|--------------------------|----------------------------|--------------------|-------------------------------|------------------------------------------|
| Xie 2019 [52]               | China<br>(Asia)   | EG 1: ESWT + TCM                 | 57.0 (11.6)                          | NR                       | 30/0      | 30 | 29/1                                   | II, III      | 15.4 (5.4)                                              | None                     | 0                          | 100.00%            | 0, 4, 16                      | VAS                                      |
|                             |                   | EG 2: ESWT                       | 55.8 (10.9)                          |                          | 30/0      | 30 | 26/4                                   |              | 16.9 (6.0)                                              |                          | 0                          | 100.00%            |                               | Lequesne's index                         |
|                             |                   | CG: TCM (fumigation)             | 56.4 (11.2)                          |                          | 30/0      | 30 | 28/2                                   |              | 15.7 (6.1)                                              |                          | 0                          | 100.00%            |                               |                                          |
| Xing 2018 [53]              | China<br>(Asia)   | EG: ESWT                         | 60.2 (10.1)                          | NR                       | 11/14     | 25 | 25/0                                   | I, II        | 7.5 (3.0-120)                                           | PM (Diclofenac           | 0                          | 100.00%            | 0, 4                          | VAS                                      |
|                             |                   | CG: Con                          | 59.7 (9.8)                           |                          | 9/15      | 24 | 24/0                                   |              | 7.8 (2.0-96)                                            | Diethylamine<br>Emulgel) | 0                          | 100.00%            |                               | Lysholm scale                            |
| Yang 2017 [54]              | China<br>(Asia)   | EG 1: ESWT + TCM<br>(fumigation) | 63.9 (9.9)                           | NR                       | 41/3      | 44 | NR                                     | NR           | NR                                                      | MSE                      | 0                          | 100.00%            | 0, 4                          | WOMAC                                    |
|                             |                   | EG 2: ESWT                       | 61.6 (11.1)                          |                          | 38/3      | 41 |                                        |              |                                                         | PM                       | 0                          | 100.00%            |                               |                                          |
|                             |                   | CG: TCM (fumigation)             | 66.3 (9.7)                           |                          | 40/5      | 45 |                                        |              |                                                         |                          | 0                          | 100.00%            |                               |                                          |
| Yang 2021 [55]              | China<br>(Asia)   | EG: ESWT                         | 57.8 (6.5)                           | NR                       | 23/14     | 37 | NR                                     | I-III        | 29.8 (7.1)                                              | MSE                      | 0                          | 100.00%            | 0, 4                          | VAS; WOMAC                               |
|                             |                   | CG: Con                          | 58.3 (7.2)                           |                          | 25/12     | 37 |                                        |              | 28.6 (6.7)                                              | Acupuncture              | 0                          | 100.00%            |                               |                                          |
| Yu 2008 [56]                | China<br>(Asia)   | EG: ESWT                         | 64.9 (8.1)                           | 27.2 (5.0)               | 26/11     | 37 | 37/0                                   | I, II        |                                                         | None                     | 5                          | 88.10%             | 0, 7, 11, 15                  | VAS; KSS                                 |
|                             |                   | CG: PLA                          | 64.8 (7.3)                           | 27.2 (5.0)               | 24/11     | 35 | 35/0                                   |              |                                                         |                          | 7                          | 83.33%             |                               | Lequesne's index                         |
| Yu 2019 [57]                | China<br>(Asia)   | EG 1: Acupoint-ESWT              | 65.6 (4.3)                           | NR                       | 46/29     | 75 | NR                                     | I-III        | 66.4 (12.8)                                             | None                     | 0                          | 100.00%            | 0, 4, 8, 12                   | WOMAC                                    |
|                             |                   | EG 2: ESWT                       | 64.4 (4.3)                           |                          | 44/31     | 75 |                                        |              | 66.1 (12.1)                                             |                          | 0                          | 100.00%            |                               |                                          |
| Zhang 2017 [58]             | China<br>(Asia)   | EG: ESWT                         | 52.6 (9.2)                           | NR                       | 30/25     | 55 | NR                                     | NR           | NR                                                      | MSE                      | 0                          | 100.00%            | 0, 4, 5, 8                    | VAS                                      |
|                             |                   | CG: CPTM (USD)                   | 53.2 (9.5)                           |                          | 28/23     | 51 |                                        |              |                                                         |                          | 0                          | 100.00%            |                               | Lysholm scale                            |
| Zhang XG 2016 [59]          | China<br>(Asia)   | EG 1: Acupoint-ESWT              | 63.6 (5.5)                           | NR                       | 25/13     | 38 | 26/12                                  | I-III        | 194.5 (92.5)                                            | None                     | 0                          | 100.00%            | 0, 2, 6, 14                   | VAS                                      |
|                             |                   | EG 2: ESWT                       | 63.9 (5.6)                           |                          | 22/15     | 37 | 24/13                                  |              | 200.2 (77.7)                                            |                          | 0                          | 100.00%            |                               | Lysholm scale                            |
| Zhang Y 2016 [60]           | China<br>(Asia)   | EG: ESWT + TCM<br>(fumigation)   | 61.8 (5.3) <sup>c</sup>              | NR                       | 46/34c    | 40 | 62/18 <sup>c</sup>                     | II, III      | 8.0-372 <sup>c</sup>                                    | None                     | 0                          | 100.00%            | 0, 3                          | Lequesne's index                         |
|                             |                   | CG: GAS + PM                     |                                      |                          |           | 40 |                                        |              |                                                         |                          | 0                          | 100.00%            |                               |                                          |
| Zhang 2020 [61]             | China<br>(Asia)   | EG: ESWT                         | 53.2 (5.0)                           | 22.6 (2.0)               | 22/11     | 33 |                                        | I-III        | 51.3 (22.4)                                             | PM (NSAID)               | 2                          | 94.29%             | 0, 6                          | WOMAC                                    |
|                             |                   | CG: Con                          | 54.3 (5.3)                           | 23.0 (2.5)               | 23/11     | 34 |                                        |              | 55.4 (21.5)                                             |                          | 1                          | 97.14%             |                               | Lequesne's index;<br>Inflammation factor |
| Zhang 2021 [62]             | China<br>(Asia)   | EG 1: HI ESWT                    | 60.9 (8.7) <sup>d</sup>              | 24.9 (2.1) <sup>d</sup>  | 22/15     | 37 | 37/0                                   | II, III      | 17.6 (6.3) <sup>d</sup>                                 | None                     | 0                          | 100.00%            | 0, 2, 4, 8                    | VAS; WOMAC                               |
|                             |                   | EG 2: MI ESWT                    | 61.8 (7.9) <sup>d</sup>              | 24.6 (1.6) <sup>d</sup>  | 23/15     | 38 | 38/0                                   |              | 18.5 (6.2) <sup>d</sup>                                 |                          | 0                          | 100.00%            |                               |                                          |
|                             |                   | EG 3: PLA (LI ESWT)              | 61.5 (5.4)                           | 25.0 (1.3)               | 8/6       | 14 | 14/0                                   |              | 15.7 (8.4)                                              |                          | 0                          | 100.00%            |                               |                                          |
| Zhao 2016 [63]              | China<br>(Asia)   | EG: ESWT                         | 52.4 (45-68) <sup>c</sup>            | NR                       | 22/38c    | 30 | NR                                     | II, III      | 28.8 (4.0-72.0) <sup>c</sup>                            | GAS, PM (NSAID)          | 0                          | 100.00%            | 0, 8                          | VAS; WOMAC                               |
|                             |                   | CG: PLA                          |                                      |                          |           | 30 |                                        |              |                                                         |                          | 0                          | 100.00%            |                               | Lequesne's index                         |

To be continued.

**Table S2.** Continued.

| Study (year)<br>[Reference]  | Country<br>(area) | Study arm                                           | Age (years) Mean<br>(SD or range) | BMI<br>(kg/m <sup>2</sup> ) | Sex (F/M)      | N        | Involved side,<br>unilateral/bilateral | K-L<br>grade | Duration of<br>symptoms<br>(months) Mean<br>(SD, range) | Co-intervention | All cause<br>withdraws (n) | Compliance<br>rate | Measured time<br>point (week) | Main outcome<br>measures                        |
|------------------------------|-------------------|-----------------------------------------------------|-----------------------------------|-----------------------------|----------------|----------|----------------------------------------|--------------|---------------------------------------------------------|-----------------|----------------------------|--------------------|-------------------------------|-------------------------------------------------|
| Zhao 2013 [64];<br>2014 [65] | China<br>(Asia)   | EG: ESWT<br>CG: PLA                                 | 59.9 (11.3)<br>61.8 (9.8)         | 26.1 (2.6)<br>25.6 (2.5)    | 20/14<br>25/11 | 34<br>36 | NR                                     | II, III      | ≥ 3.0                                                   | None            | 4<br>5                     | 88.24%<br>86.11%   | 0, 1, 4, 12, 16               | VAS; WOMAC<br>Lequesne's index                  |
| Zheng 2021 [66]              | China<br>(Asia)   | EG: ESWT<br>CG: PM (NSAID)                          | 62.3 (1.2)<br>62.2 (1.4)          | 25.3 (0.2)<br>25.2 (0.4)    | 24/23<br>25/22 | 47<br>47 | NR                                     | II, III      | 23.1 (2.4)<br>23.2 (2.6)                                | None            | 0<br>0                     | 100.00%<br>100.00% | 0, 5                          | VAS;<br>Lequesne's index<br>Inflammation factor |
| Zhong 2019 [67]              | China<br>(Asia)   | EG 1: ESWT<br>EG 2: PLA (LI ESWT)                   | 62.5 (8.2)<br>63.2 (7.7)          | 25.3 (2.3)<br>25.4 (2.9)    | 21/11<br>19/12 | 32<br>31 | NR                                     | II, III      | 34.7 (15.4)<br>34.1 (14.2)                              | MSE             | 2<br>1                     | 93.75%<br>96.77%   | 0, 5, 12                      | VAS; WOMAC<br>Lequesne's index                  |
| Zhou 2019 [68]               | China<br>(Asia)   | EG 1: ESWT + MSE<br>EG 2: ESWT                      | 69.9 (4.7)<br>69.7 (4.6)          | NR                          | 26/16<br>27/15 | 42<br>42 | NR                                     | NR           | 15.6 (6.0)<br>14.4 (7.2)                                | None            | 0<br>0                     | 100.00%<br>100.00% | 0, 1                          | VAS; WOMAC<br>Lequesne's index                  |
| Zhu CY 2021 [69]             | China<br>(Asia)   | EG 1: Acupoint_ESWT + TCM<br>EG 2: Acupoint_ESWT    | 46.9 (11.2)<br>47.8 (10.1)        | NR                          | 31/25<br>29/27 | 56<br>56 | NR                                     | NR           | 49.4 (22.9)<br>48.1 (19.9)                              | MSE             | 0<br>0                     | 100.00%<br>100.00% | 0, 8                          | VAS<br>JOA                                      |
| Zhu HM 2021 [70]             | China<br>(Asia)   | EG 1: ESWT + Acupuncture<br>EG 2: ESWT + PM (NSAID) | 58.9 (13.6)<br>59.9 (13.8)        | NR                          | 24/16<br>23/17 | 40<br>40 | NR                                     | I-III        | 12.3 (5.6)<br>12.9 (4.1)                                | None            | 0<br>0                     | 100.00%<br>100.00% | 0, 2                          | WOMAC                                           |

Con, control; CPTM, conventional physical therapy modality; ESWT, extracorporeal shockwave therapy; FIM, Functional Independence Measure; GAS, glucosamine ammonia sugar; HSS, Hospital for Special Surgery; IFC, interferential current; JOA, Japanese orthopaedics association; KOOS, Knee Injury and Osteoarthritis Outcome Score; KSS, Knee Society Score; KT, kinesio taping; MWM, mobilization with movement; NSAID, non-steroidal anti-inflammatory drug; PLA, placebo; PM, pain medication; TENS, transcutaneous electrical nerve stimulation; USD, ultrasound diathermy.

**Reference**

1. Aletaiбиеke, N.; Zhang, Y.L.; Sun, K.J.; Li, K.X. Clinical efficacy of extracorporeal shockwave therapy for treating early and middle stage of knee osteoarthritis. *J Nongken Med.* **2016**, *38*, 434-436.
2. Ammar, T. Shock wave therapy versus interferential therapy in knee osteoarthritis. *Int J Physiother Res.* **2018**, *6*, 2771-2776.
3. Cai, C.Y.; Liang, X.D.; Shan, H.X. Analysis on efficacy of extracorporeal shock wave combined with glucosamine in the treatment of knee osteoarthritis. *Youjiang Med J.* **2021**, *49*, 126-129.
4. Chang, Y.W.; Ji, J.G. Effect of radial extracorporeal shock wave acupoint therapy combined with Duhuo Jisheng Decoction on lower limb function in elderly patients with knee osteoarthritis. *J Hubei Uni Chin Med.* **2021**, *23*, 100-103.
5. Chen, T.W.; Lin, C.W.; Lee, C.L.; Chen, C.H.; Chen, Y.J.; Lin, T.Y.; Huang, M.H. The efficacy of shock wave therapy in patients with knee osteoarthritis and popliteal cyamella. *Kaohsiung J Med Sci.* **2014**, *30*, 362-370.
6. Cho, S.J.; Yang, J.R.; Yang, H.S.; Yang, H.E. Effects of Extracorporeal Shockwave Therapy in Chronic Stroke Patients With Knee Osteoarthritis: A Pilot Study. *Ann Rehabil Med.* **2016**, *40*, 862-870.
7. Cui, X.Q. Twenty-Five Cases of Knee Osteoarthritis Treated with Extracorporeal Shock Wave in Combination with Zishen Gukang Pill. *Henan Tradit Chin Med.* **2015**, *35*, 1323-1324.
8. Dou, Y.S.; Yuan, J.; Zhao, J.Y. Investigation of short-term efficacy of extracorporeal shock wave therapy for knee osteoarthritis. *Chin J Rehabil Med.* **2016**, *31*, 917-919.
9. Ediz, L.; Özgökce, M. Effectiveness of Extracorporeal Shock Wave Therapy to Treat Primary Medial Knee Osteoarthritis with and without Bone Marrow Edema in Elderly Patients. *Turk J Geriatri.* **2018**, *21*, 394-401.



10. Eftekharsadat, B.; Jahanjoo, F.; Toopchizadeh, V.; Heidari, F.; Ahmadi, R.; Babaei-Ghazani, A. Extracorporeal shockwave therapy and physiotherapy in patients with moderate knee osteoarthritis. *Crescent J Med Biol Sci.* **2020**, *7*, 518-526.
11. Elerian, A.E.; Ewidea, T.A. Effect of shock wave therapy versus corticosteroid injection in management of knee osteoarthritis. *Int J Physiother.* **2016**, *3*, 246-251.
12. Elgendy, M.H.; Elsamahy, S.A.; Mostafa, M.S.E.M.; Hamza, M.S.K. Efficacy of shockwave therapy versus intra-articular platelet-rich plasma injection in management of knee osteoarthritis: A randomized controlled trial. *Int J Pharm Res.* **2020**, *12*, 4283-4289.
13. El-Sakka, S.S.; Hussein, M.I.; El-Barbary, A.M.; Rehan, F.S. The Effect of Shock Wave Therapy as a New Modality for Treatment of Primary Knee Osteoarthritis. *Egypt J Hosp Med.* **2019**, *75*, 2092-2097.
14. Feng, Y.J.; Cao, Z. Clinical effect of Zhuifeng Tougu Capsules combined with shock wave in the treatment of knee osteoarthritis in postmenopausal women. *Chin Mod Med.* **2019**, *26*, 112-114.
15. Günaydin Ö, E.; Tunay, V.B. Comparison of the added effects of kinesio taping and extracorporeal shockwave therapy to exercise alone in knee osteoarthritis. *Physiother Theory Pract.* **2020**, 1-9.
16. Guo, Y.J.; Dong, J.L.; Liu, K.; Wang, Y.J.; Mu, C.L.; Wang, P.; Shen, X.N.; Yan, L. Clinical observation on treatment of knee osteoarthritis combined with goose foot bursitis by Chinese herbal fumigation and shock wave. *China J Trad Chin Med Pharm.* **2019**, *34*, 4962-4965.
17. Hammam, R.F.; Kamel, R.M.; Draz, A.H.; Azzam, A.A.; Abu El Kasem, S.T. Comparison of the effects between low- versus medium-energy radial extracorporeal shock wave therapy on knee osteoarthritis: A randomised controlled trial. *J Taibah Univ Med Sci.* **2020**, *15*, 190-196.
18. He, N.; Zhang, G.J. Curative effectiveness of comprehensive rehabilitation treatment for knee osteoarthritis. *Chin J Rehabil.* **2014**, *29*, 447-449.
19. He, Z.W.; Zhao, W.B. Efficacy of Arthroscopic Debridement Combined with Extracorporeal Shock Wave Treatment of Knee Osteoarthritis. *J Shenyang Med Coll.* **2016**, *18*, 347-349.
20. He, Y.H.; Peng, X.; Li, Q. Clinical effect of extracorporeal shock wave combined with etoricoxib for knee osteoarthritis in the early and mid-term stage. *Shanxi Med J.* **2021**, *50*, 445-446.
21. Imamura, M.; Alamino, S.; Hsing, W.T.; Alfieri, F.M.; Schmitz, C.; Battistella, L.R. Radial extracorporeal shock wave therapy for disabling pain due to severe primary knee osteoarthritis. *J Rehabil Med.* **2017**, *49*, 54-62.
22. Ji, J.J.; Fang, M.Q.; Zhu, T.; Wang, Y.Y.; Chen, X.H. Radial extracorporeal shock wave acupoint therapy for elderly patients with knee osteoarthritis and analysis of its mechanism. *Chin J Mult Organ Dis Elderly.* **2021**, *20*, 410-413.
23. Jiang, L.M.; Huang, S.J.; Yu, X.M.; Tao, Y.; Shen, L.H. Efficacy of extracorporeal shock wave combined joint mobilization for knee osteoarthritis. *Chin J Bone J Inj.* **2017**, *32*, 1299-1301.
24. Kim, J.H.; Kim, J.Y.; Choi, C.M.; Lee, J.K.; Kee, H.S.; Jung, K.I.; Yoon, S.R. The Dose-Related Effects of Extracorporeal Shock Wave Therapy for Knee Osteoarthritis. *Ann Rehabil Med.* **2015**, *39*, 616-623.
25. Kuang, G.Y.; K., Y.; Ou, L.; Chen, G.Q.; Chai, S.; Lu, M. Effects of combination of Jia Wei Duhuo Jisheng Mixture and extracorporeal shock wave therapy on knee osteoarthritis. *Chin J Gerontol.* **2017**, *37*, 1708-1709.
26. Li, C.H.; Wei, Q.; Wei, S.L.; Feng, Y.G.; Wang, H.J. Clinical Observation on 167 Cases of Knee Osteoarthritis Treated with Extracorporeal Shock Wave Combining Yishen Juanbi Wan. *Rheum Arthritis.* **2018**, *7*, 42-45.
27. Li, J.W.; Zheng, S.J.; Zhang, J.C.; Huang, J.J.; Liu, X.G. Effect of Acupuncture plus Different Frequency Shock-wave Interventions on Pain Reactions and Motor Function in Knee Osteoarthritis Patients. *Acupuncture Research.* **2015**, *40*, 300-303.
28. Li, M.Z.; Zhang, Y.M.F.; Li, T.; Zhou, M.W. Effects of extracorporeal shock wave in the treatment for knee osteoarthritis. *Chin J Clin Healthc.* **2020**, *35*, 1444-1449.
29. Li, R.X. Effect of Extracorporeal Shock Wave Therapy on Lower Limb Function and Articular Cartilage in Patients with Knee Osteoarthritis *J Clin Orthop.* **2021**, *13*, 86-88.
30. Li, T.; Song, Q.Z.; Pei, J.X.; Wang, Y.L.; Niu, L.C. Observation on short term effect of extracorporeal shock wave for treating early and middle stage of knee osteoarthritis. *Chongqing Med.* **2017**, *46*, 338-340.
31. Liu, B.Y.; Li, H.Y.; Xi, L.C.; Huang, S.C.; Wei, M.Z.; Wang, H.R. Comparison of early clinical outcomes of extracorporeal shock wave therapy in different energy flux densities for moderate knee osteoarthritis. *Orthop J China.* **2020**, *28*, 908-912.

32. Liu, M.Y.; Li, H.; Zhang, Y.Q.; Ma, T.; Li, J.X.; Mao, Y.R.; Han, N.H. Efficacy of extracorporeal shock wave therapy in elderly patients with knee osteoarthritis and its influence on inflammatory factors. *Hainan Med J.* **2017**, *28*, 4015-4017.
33. Liu, W.D.; Xue, K.L.; Tian, M. Comparative study of pneumatic lithotripsy extracorporeal shock wave and acupotomelysis in the treatment of knee osteoarthritis. *J Cervicodynia Lumbodynia.* **2017**, *38*, 64-67.
34. Liu, Y.; Wu, K.; Liu, S.T.; Zhao, Z.; Yang, J.; Xing, G.Y. Curative effect of extracorporeal shock wave therapy in elderly women with knee osteoarthritis. *Med J Chin Peop Armed Poli Forc.* **2016**, *27*, 349-352.
35. Liu, Y., X.; Zhou, H.L.; Xu, L.L.; Li, T.T. Effect of extracorporeal shockwave combined with rehabilitation measures on Coll2-1 and COMP level in patients with early and middle stage knee osteoarthritis. *Orthopaedics.* **2018**, *9*, 302-305.
36. Lizis, P.; Kobza, W.; Manko, G. Extracorporeal shockwave therapy vs. kinesiotherapy for osteoarthritis of the knee: A pilot randomized controlled trial. *J Back Musculoskelet Rehabil.* **2017**, *30*, 1121-1128.
37. Lizis, P.; Kobza, W.; Manko, G.; Para, B. The Influence of Extracorporeal Shockwave Therapy and Kinesiotherapy on Health Status in Females with Knee Osteoarthritis: A Randomized Controlled Trial. *Int J Gen Med Surg.* **2017**, *1*, 108.
38. Lizis, P.; Kobza, W.; Manko, G.; Para, B.; Jaszczur-Nowicki, J. Extracorporeal shockwave therapy is more effective than ultrasound on osteoarthritis of the knee: A pilot randomized controlled trial. *Int J Gen Med Surg.* **2018**, *2*, 112.
39. Ma, G.F. The Effect of Chinese herbal fumigation combined with shock wave on treatment of knee osteoarthritis with Pes Anserine Bursitis. *Chin J Clin Ration Drug Use.* **2020**, *13*, 137-139.
40. Qin, X. Clinical efficacy of extracorporeal shock wave in the treatment of osteoarthritis of the knee. *Chin Manipul Rehabil Med.* **2018**, *9*, 51-52.
41. Shen, M.P.; Dai, M.C.; Qin, Q.K.; Luo, C.Y.; Pu, L.F. Effects of Extracorporeal Shock Wave Treatment on Three-Dimensional Spatiotemporal Gait Parameters in Patients with Knee Osteoarthritis. *Pract Clin Med.* **2016**, *17*, 4-7.
42. Shenouda, M.M.S.S. Efficacy of extracorporeal Shock wave therapy versus mobilization with movement on pain, disability and range of motion in patients with knee osteoarthritis. *Bull Fac Phys Ther.* **2013**, *18*, 65-74.
43. Shi, D.; Chen, L.; Zeng, R.H. Observation on the curative effect of silver needle combined with shock wave in the treatment of knee osteoarthritis. *Mod J Integr Trad Chin Western Med.* **2020**, *29*, 1111-1114.
44. Uysal, A.; Yildizgoren, M.T.; Guler, H.; Turhanoglu, A.D. Effects of radial extracorporeal shock wave therapy on clinical variables and isokinetic performance in patients with knee osteoarthritis: a prospective, randomized, single-blind and controlled trial. *Int Orthop.* **2020**, *44*, 1311-1319.
45. Wang, A.H.; Li, J.J.; Hou, G.H.; He, Y.Y. Clinical Observation of 42 Cases of Knee Osteoarthritis in Early and Middle Stage Treated with Extracorporeal Shock Wave Combined with Lower Limb Skin Traction. *Rheum Arthritis.* **2021**, *10*, 15-18.
46. Wang, H.R.; Li, H.Y.; Jin, X.Y.; Liang, B.; Yin, D.; Feng, D.R.; Lv, Y.N.; Huang, Q.; Zhao, Z.X.; Liu, B.Y., et al. Clinical study on the treatment of knee osteoarthritis with extracorporeal shock wave combined with Traditional Chinese Medicine Duhuo Jisheng decoction. *Chin J New Clin Med.* **2020**, *13*, 52-56.
47. Wang, L.L.; Dong, Y.; Liang, S.; Zhang, H.; Li, F.H.; Liu, F.; Tong, X.; Song, Y.P. Clinical application of radial shockwave therapy for knee osteoarthritis. *J Cervicodynia & Lumbodynia.* **2016**, *37*, 354-355.
48. Wang, T.S.; Guo, P.; Li, G.; Wang, J.W. Extracorporeal Shockwave Therapy for Chronic Knee Pain: A Multicenter, Randomized Controlled Trial. *Altern Ther Health Med.* **2020**, *26*, 34-37.
49. Wang, Y.Y.; Chen, X.H.; Rong, Z.; Ji, J.J.; Wu, Y.Y. Clinical observation of acupoint therapy of radio extracorporeal shock wave combined with shock wave intervention at tenderness point in the treatment of elderly patients with knee osteoarthritis. *Shanghai J Tradit Chin Med.* **2020**, *54*, 98-100.
50. Wu, W.; Ye, L.; Zheng, B.J.; Feng, J.J.; Chen, X.Q.; Lui, H.R.; Xu, W.H.; Wang, X.R. Efficacy and safety of extracorporeal shock wave therapy for knee osteoarthritis. *Shanghai Med J.* **2014**, *37*, 669-672.

51. Xiao, C.L.; Ding, W.T.; Tan, W.; Liu, S.S.; Yi, Z.H. Analysis of the effect of extracorporeal shock wave therapy combined with isokinetic training for knee osteoarthritis in early and mid-term stage. *Pract Clin J Integr Trad Chin Western Med*. **2021**, 21, 31-32,78.
52. Xie, B.Z.; Li, D.D.; Yin, N.; W., W.Z. A clinical study on treating knee osteoarthritis in early and middle stage by fumigation with Pingle Xitongning plus shock wave. *Clin J Chinese Med*. **2019**, 11, 109-111.
53. Xing, J.; Hu, S.H.; Tang, C.C.; Cheng, Q. Therapeutic effect of extracorporeal shock wave for patients with knee osteoarthritis. *Chin J Rehabil*. **2018**, 33, 505-507.
54. Yang, Q.X.; Zhu, W.L.; Cao, C.P.; Cao, Z.; Tan, Y.S. A clinical study on treating knee osteoarthritis by extracorporeal shock wave plus TCM medicine fumigation. *Clin J Chin Med*. **2017**, 35, 81-83.
55. Yang, Y.K.; Wu, X.H.; Yang, M.J. Clinical Observation of Shock Wave and Tendon Acupuncture Guided by Musculoskeletal Ultrasound for the Treatment of Knee Osteoarthritis. *J Pract Trad Chin Med*. **2021**, 1, 1233-1235.
56. Yu, T.C.; Chen, X.Y.; Dong, S.N.; Zhen, X.Q. Shockwave therapy for knee osteoarthritis: a single blind parallel simulation control trial. *Chin J Gerontol*. **2008**, 13, 1301-1303.
57. Yu, W.H.; Yang, W.L.; Jiao, P.Z.; Zhao, Z.J.; Feng, H.; Wen, Q.X.; Bu, Q.K.; Fan, Y.L. Clinical Study on Shock Wave Acupoint Therapy for Knee Osteoarthritis. *Hebei Med*. **2019**, 25, 1523-1526.
58. Zhang, T.; Liu, W.B.; Li, H.; Xiao, L. The Clinical Study of Radial Shock Wave Therapy in the Treatment of Knee Osteoarthritis. *Med Inn China*. **2017**, 14, 36-40.
59. Zhang, X.G.; Li, J.W.; Zheng, S.J.; Zhang, J.C.; Huang, J.J.; Liu, X.G. Observation on the Clinical Effect of Extracorporeal Shock Wave Acupuncture in the Treatment of Knee Osteoarthritis. *Guangming J Chin Med*. **2016**, 31, 2441-2444.
60. Zhang, Y.; Zhang, H. Clinical Observation of Shentongzhuyu Decoction and Extracorporeal Shock Wave Therapy to Treat Senile Knee Osteoarthritis. *Asia-Pacific Tradit Med*. **2016**, 12, 150-151.
61. Zhang, Y.F.; Li, K.X.; Wei, Q.; Feng, Y.Q. Clinical observation of extracorporeal shock wave combined with etoricoxib for early and mid-stage knee osteoarthritis *Shandong Med J*. **2020**, 60, 60-62.
62. Zhang, Y.F.; Liu, Y.; Chou, S.W.; Weng, H. Dose-related effects of radial extracorporeal shock wave therapy for knee osteoarthritis: A randomized controlled trial. *J Rehabil Med*. **2021**, 53, jrm00144.
63. Zhao, A.Q.; Xie, W.L.; Wang, Y. Effect of extracorporeal shock wave on the level of Chemerin in serum and synovia in patients with knee osteoarthritis. *Mil Med J Se China*. **2016**, 18, 498-500.
64. Zhao, Z.; Jing, R.; Shi, Z.; Zhao, B.; Ai, Q.; Xing, G. Efficacy of extracorporeal shockwave therapy for knee osteoarthritis: a randomized controlled trial. *J Surg Res*. **2013**, 185, 661-666.
65. Zhao, Z.; Shi, Z.; Yan, J.; Ai, Q.; Ding, Z.K.; Xing, G.Y. Effects of Extracorporeal Shock Wave Therapy on Early to Mid-term Knee Osteoarthritis:A Randomized Controlled Clinical Tri-al. *Chin J Rehabil Theor Pract*. **2014**, 20, 76-78.
66. Zheng, Y.L.; Yang, Q.S. The effect of extracorporeal shock wave therapy on clinical related indexes in patients with knee osteoarthritis. *Chinese J Clin*. **2021**, 49, 717-719.
67. Zhong, Z.; Liu, B.; Liu, G.; Chen, J.; Li, Y.; Chen, J.; Liu, X.; Hu, Y. A Randomized Controlled Trial on the Effects of Low-Dose Extracorporeal Shockwave Therapy in Patients With Knee Osteoarthritis. *Arch Phys Med Rehabil*. **2019**, 100, 1695-1702.
68. Zhou, S.N.; Wang, L.; Qiu, Y.Y.; Liang, L.P.; Li, J.Y.; Jin, Z. Effect of shock wave therapy combined with lower limb muscle strength exercise on patients with knee osteoarthritis pain. *Chin J Clin Healthc*. **2019**, 22, 464-467.
69. Zhu, C.Y.; Xiong, Y.S.; Liu, B.; Cheng, J.Z.; Lu, X.H. The application effect of the TCM nursing intervention on the knee osteoarthritis patients with the extracorporeal shock wave acuponit therapy. *Nurs Pract Res*. **2021**, 18, 969-973.
70. Zhu, H.M.; Yu, K.Q.; Wu, L.X.; Dai, M.Y. Clinical Study on Sinew Acupuncture Combined with Extracorporeal Shock Wave for Knee Osteoarthritis in Early and Middle Stage. *J New Chin Med*. **2021**, 53, 157-160.

**Table S3.** Summary of characteristics and application parameters of extracorporeal shockwave therapy.

| Study<br>(Author, year) | Energy generator | Source of energy | Device (apparatus)                                   | Manufacturer                                            | Shockwave treatment protocol         |                                                         |                                     |                                        |                                          |                                 |                                |
|-------------------------|------------------|------------------|------------------------------------------------------|---------------------------------------------------------|--------------------------------------|---------------------------------------------------------|-------------------------------------|----------------------------------------|------------------------------------------|---------------------------------|--------------------------------|
|                         |                  |                  |                                                      |                                                         | Application parameters (per session) |                                                         |                                     |                                        | Treatment<br>frequency<br>(session/week) | Treatment<br>duration<br>(week) | Total<br>treatment<br>sessions |
|                         |                  |                  |                                                      |                                                         | Experimental group (EG)              |                                                         |                                     | Comparator group                       |                                          |                                 |                                |
|                         |                  |                  |                                                      |                                                         | Rate<br>(Hz)                         | EFD <sup>a</sup><br>(mJ/mm <sup>2</sup> )               | No. of impulses                     | EFD <sup>a</sup> (mJ/mm <sup>2</sup> ) |                                          |                                 |                                |
| Aletaibieke, 2016       | Radial           | Pneumatic        | NR                                                   | EMS, Switzerland                                        | 6                                    | 0.25                                                    | 4000                                | 0                                      | 1                                        | 4                               | 4                              |
| Ammar 2018              | Focused          | Electrohydraulic | Evotron RFL0300                                      | Swiss Tech Medical AG,<br>Switzerland                   | 1–4                                  | 0.05                                                    | 1000                                | NA                                     | 1                                        | 4                               | 4                              |
| Cai 2021                | Focused          | Electrohydraulic | HK.ESWO-AJ II                                        | Wikkon, China                                           | NR                                   | 0.202–0.205                                             | 4000                                | NA                                     | 2                                        | 6                               | 12                             |
| Chang 2021              | Radial           | Pneumatic        | MP200                                                | Storz, Germany                                          | 12                                   | 0.13–0.25                                               | 3000 (500<br>impulse/acupoint)      | NA                                     | 1                                        | 4                               | 4                              |
| Chen 2014               | Focused          | Piezoelectric    | Piezowave                                            | Wolf, Germany                                           | 1–8                                  | 0.03–0.4                                                | 2000                                | NA                                     | 1                                        | 6                               | 6                              |
| Cho 2016                | Focused          | Electromagnetic  | Dornier Aries                                        | DMT, Germany                                            | NR                                   | 0.05                                                    | 1000                                | 0                                      | 1                                        | 3                               | 3                              |
| Cui 2015                | Focused          | NR               | NR                                                   | NR                                                      | 1–2                                  | 0.15                                                    | 600–1200                            | NA                                     | 2                                        | 4                               | 8                              |
| Dou 2016                | Focused          | NR               | NR                                                   | Wikkon, China                                           | 1                                    | 0.1–0.15                                                | 1000–1600                           | NA                                     | 1–2                                      | 3                               | 8                              |
| Ediz 2018               | Radial           | Pneumatic        | The ballistic system Shock<br>Med™ of Medical Italia | Medical Italia brand (SN:<br>EK1238092), EME, Italy     | 12                                   | 0.25                                                    | 2500                                | Minimal energy pulses                  | 2                                        | 5                               | 10                             |
| Eftekharsadat 2020      | Radial           | Electromagnetic  | Zimmer enPulsPro Medizin<br>System GmbH              | Zimmer, Germany                                         | 10–16                                | 0.18                                                    | 2000                                | NA                                     | 1–2                                      | 3                               | 5                              |
| Elerian 2016            | Radial           | Pneumatic        | LGT-200S                                             | Longest, China                                          | 5                                    | 0.18                                                    | 2000                                | Sham                                   | 1                                        | 3                               | 3                              |
| Elgendy 2020            | Radial           | NR               | NR                                                   | NR                                                      | 5                                    | 1.25                                                    | 2000                                | NA                                     | 1                                        | 4                               | 4                              |
| El-Sakka 2019           | Radial           | Pneumatic        | DolorClast                                           | EMS, Switzerland                                        | 8                                    | 2.5–4.0                                                 | 1000                                | NA                                     | 1                                        | 3                               | 3                              |
| Feng 2019               | Radial           | Pneumatic        | DolorClast Master                                    | EMS, Switzerland                                        | 8                                    | 0.2                                                     | 2000                                | NA                                     | 1                                        | 4                               | 4                              |
| Gunaydin 2020           | Radial           | Pneumatic        | DolorClast                                           | EMS, Switzerland                                        | 6–8                                  | 0.25                                                    | 2000                                | NA                                     | 1                                        | 6                               | 6                              |
| Guo 2019                | Radial           | Pneumatic        | XY-K-SONOTHERA-500                                   | Xiangyu Medical, China                                  | 7                                    | 0.06–0.13                                               | 2000                                | NA                                     | 2                                        | 2                               | 4                              |
| Hammam 2020             | Radial           | Pneumatic        | EME S.r.l.                                           | EME® Physio Division (Via<br>Degli Abeti Pesaro), Italy | 10                                   | EG 1: 0.178;<br>EG 2: 0.02                              | 2000                                | 0                                      | 1                                        | 4                               | 4                              |
| He 2014                 | Radial           | Pneumatic        | BTL-5000                                             | BTL, China                                              | 10                                   | 0.1                                                     | 3000                                | NA                                     | 1                                        | 4                               | 4                              |
| He 2016                 | Radial           | Pneumatic        | NR                                                   | Storz, Switzerland                                      | 9–10                                 | 0.2–0.25                                                | 2500–3000                           | NA                                     | 2–3                                      | 2                               | 5                              |
| He 2021                 | Radial           | Pneumatic        | MASTERPULS MP100                                     | STORZ MEDICAL AG,<br>Switzerland                        | 6                                    | 0.2                                                     | 4000                                | NA                                     | 1                                        | 6                               | 6                              |
| Imamura 2017            | Radial           | Pneumatic        | DolorClast                                           | EMS, Switzerland                                        | 8                                    | 0.1–0.16                                                | 2000                                | 0                                      | 1                                        | 3                               | 3                              |
| Ji 2021                 | Radial           | Pneumatic        | MP200                                                | Storz, Switzerland                                      | 8–12                                 | NR                                                      | 3000–3500 (300<br>impulse/acupoint) | NA                                     | 2                                        | 12                              | 24                             |
| Jiang 2017              | Radial           | Pneumatic        | NR                                                   | Switzerland                                             | 6                                    | 0.25                                                    | 4000                                | NA                                     | 1                                        | 4                               | 4                              |
| Kim 2015                | Focused          | Electromagnetic  | Dornier Epos Ultra                                   | DMT, USA                                                | NR                                   | 0.093                                                   | 1000                                | 0.04                                   | 1                                        | 3                               | 3                              |
| Kuang 2017              | Radial           | Pneumatic        | NR                                                   | STORZ MEDICAL AG,<br>Switzerland                        | 16                                   | 0.09                                                    | 600–700<br>impulse/pain point       | NA                                     | 2                                        | 5                               | 10                             |
| Li 2018                 | Radial           | Pneumatic        | DolorClast                                           | EMS, Switzerland                                        | 9                                    | 0.2                                                     | 200                                 | NA                                     | 1                                        | 24                              | 24                             |
| Li 2015                 | Radial           | Pneumatic        | DolorClast                                           | EMS, Switzerland                                        | 10–18                                | 0.08–0.4                                                | 3000                                | NA                                     | 3                                        | 2                               | 6                              |
| Li MZ 2020              | Radial           | Pneumatic        | LGT-B2500                                            | Longest, China                                          | 10                                   | 0.06–0.13                                               | 1000                                | 0                                      | 2–3                                      | 4                               | 8–12                           |
| Li RX 2021              | Radial           | NR               | NR                                                   | NR                                                      | 8                                    | 0.2                                                     | 2000                                | NA                                     | 1                                        | 4                               | 4                              |
| Li 2017                 | Radial           | Pneumatic        | MASTERPULS MP100                                     | STORZ MEDICAL AG,<br>Switzerland                        | 6–8                                  | 0.2–0.25                                                | 4000–6000                           | 0                                      | 1                                        | 4                               | 4                              |
| Liu 2020                | Radial           | Pneumatic        | MASTERPULS MP100                                     | STORZ MEDICAL AG,<br>Switzerland                        | 10                                   | EG 1: 0.22;<br>EG 2: 0.18;<br>EG 3: 0.14;<br>EG 4: 0.10 | 2000                                | 0.06                                   | 1                                        | 4                               | 4                              |
| Liu MY 2017             | Radial           | Pneumatic        | EMS                                                  | Storz, Switzerland                                      | 6–8                                  | 0.2–0.25                                                | 2000                                | 0                                      | 1                                        | 4                               | 4                              |
| Liu WD 2017             | Radial           | Pneumatic        | LGT-B2500                                            | Longest, China                                          | 6–10                                 | 0.05–0.1                                                | 2000                                | NA                                     | 1                                        | 6                               | 6                              |
| Liu 2016b               | Radial           | Pneumatic        | DolorClast                                           | EMS, Switzerland                                        | 7                                    | 0.05–0.1                                                | 2000                                | NA                                     | 1                                        | 8                               | 8                              |

|                 |         |                  |                                   |                                       |       |                        |                                         |         |                         |     |      |
|-----------------|---------|------------------|-----------------------------------|---------------------------------------|-------|------------------------|-----------------------------------------|---------|-------------------------|-----|------|
| Liu YW 2018     | Focused | Electromagnetic  | HK ESWL-Vm                        | Wikkon, China                         | 6     | NR                     | 1800–3000 (800-1000 impulse/pain point) | NA      | 2                       | 3   | 6    |
| Lizis 2017a     | Radial  | Pneumatic        | Rosetta                           | CRT, Korea                            | 8     | 0.4                    | 1000–2000                               | NA      | 1                       | 5   | 5    |
| Lizis 2017b     | Radial  | Pneumatic        | Rosetta                           | CRT, Korea                            | 8     | 0.4                    | 1000–2000                               | NA      | 1                       | 5   | 5    |
| Lizis 2018      | Radial  | Pneumatic        | Rosetta                           | CRT, Korea                            | 8     | 0.4                    | 1000–2000                               | NA      | 1                       | 5   | 5    |
| Ma 2020         | Radial  | NR               | NR                                | NR                                    | 7     | 0.06-0.13              | 2000                                    | NA      | 5                       | 2   | 10   |
| Qin 2018        | Focused | NR               | NR                                | STORZ MEDICAL AG, Switzerland         | 1     | 0.12                   | 2000                                    | NA      | 1–2                     | 2   | 3    |
| Shen 2016       | Radial  | Pneumatic        | DolorClast                        | EMS, Switzerland                      | 10–12 | 0.1–0.25               | 1000–2500                               | NA      | 1                       | 4   | 4    |
| Shenouda 2013   | Radial  | NR               | Shock Master                      | Gymna, USA                            | 6     | 0.18                   | 2000                                    | NA      | 1                       | 5   | 5    |
| Shi D 2020      | Focused | Electromagnetic  | Dornier AR2                       | DMT, Germany                          | 10    | 3.6-4.2                | 2000–4000                               | NA      | 1                       | 4   | 3–4  |
| Uysal 2020      | Radial  | Pneumatic        | vibrolith ortho tip ESWT          | ELMED, Turkey                         | 10    | 0.13-0.25              | 2000                                    | 0.1 bar | 1                       | 3   | 3    |
| Wang AH 2021    | Radial  | Pneumatic        | NR                                | STORZ MEDICAL AG, Switzerland         | 10    | 0.09-0.25              | 2000                                    | NA      | 1                       | 4   | 4    |
| Wang HR 2020    | Radial  | Pneumatic        | MASTERPULS MP100                  | STORZ, Switzerland                    | 10    | 0.25                   | 2000                                    | NA      | 1                       | 4   | 4    |
| Wang 2016       | Radial  | Pneumatic        | MP100                             | Storz, Switzerland                    | 12–16 | 0.08–0.25              | 8000–10000                              | NA      | 1                       | 6   | 6    |
| Wang TS 2020    | Radial  | Pneumatic        | Sonothera                         | Hanil-TM Co, Korea                    | 15    | 0.25                   | 4000                                    | 0       | 3                       | 10  | 30   |
| Wang YY 2020    | Radial  | Pneumatic        | MP200                             | Storz, Germany                        | 12    | 0.13-0.25              | 1000-3000 (500 impulse/acupoint)        | NA      | 1                       | 8   | 8    |
| Wu 2014         | Radial  | Pneumatic        | MP100                             | Storz, Switzerland                    | 20    | 0.1–0.4                | 3000                                    | NA      | 1                       | 4   | 4    |
| Xiao 2021       | Radial  | Pneumatic        | MASTERPULS MP100                  | STORZ, Switzerland                    | 10    | 0.1                    | 2000                                    | NA      | 1                       | 4   | 4    |
| Xie 2019        | Radial  | Pneumatic        | MASTERPULS MP100                  | STORZ, Switzerland                    | 8     | 0.25                   | 3000                                    | NA      | 1                       | 4   | 4    |
| Xing 2018       | Radial  | Pneumatic        | LGT-B2510A                        | Longest, China                        | 10    | 0.20-0.30              | 2000                                    | NA      | 1                       | 4   | 4    |
| Yang 2017       | Radial  | Pneumatic        | Swiss DolorClast Smart ( FT-203 ) | EMS, Switzerland                      | 6     | 0.13-0.25              | 2000–4000                               | NA      | 1                       | 4   | 4    |
| Yang 2021       | Radial  | Pneumatic        | NR                                | NR                                    | 7–11  | 0.08-0.18              | 2000–2500                               | NA      | 3                       | 4   | 12   |
| Yu 2008         | Focused | Electrohydraulic | KDE-2001                          | ZJAM, China                           | NR    | 0.16–0.3               | 600–1000                                | Sham    | 2                       | 1–3 | 2–6  |
| Yu 2019         | Radial  | Pneumatic        | Haobro Medical Device-V1.0        |                                       | 8–12  | 0.09-0.15              | 3000–3500                               | NA      | 2                       | 9   | 15   |
| Zhang 2017      | Radial  | Pneumatic        | DolorClast                        | EMS, Switzerland                      | 10–15 | 0.1–0.3                | 3000                                    | NA      | 1                       | 5   | 5    |
| Zhang XG 2016   | Radial  | Pneumatic        | Swiss DolorClast MP100            | EMS, Switzerland                      | 14    | 0.08-0.14              | 600 impulses per acupoint or pain point | NA      | 2–3                     | 2   | 5    |
| Zhang Y 2016    | Focused | Electrohydraulic | HK.ESWO-AJ II                     | Wikkon, China                         | NR    | 0.16                   | 3000                                    | NA      | 3                       | 3   | 8–10 |
| Zhang 2020      | Radial  | Pneumatic        | MASTERPULS MP100                  | STORZ, Switzerland                    | 6     | 0.2                    | 4000                                    | NA      | 1                       | 6   | 6    |
| Zhang 2021      | Radial  | Pneumatic        | Swiss DolorClast                  | EMS, Switzerland                      | 8     | EG 1: 0.24; EG 2: 0.12 | 2000–4000                               | 0.02    | 1                       | 4   | 4    |
| Zhao 2016       | Focused | NR               | NR                                | NR                                    | 6–10  | 0.2–0.3                | 4000–6000                               | 0       | 1                       | 8   | 8    |
| Zhao 2013; 2014 | Radial  | Pneumatic        | DolorClast                        | EMS, Switzerland                      | 6     | 0.25                   | 4000                                    | 0       | 1                       | 4   | 4    |
| Zheng 2021      | Radial  | Pneumatic        | NR                                | Wikkon, China                         | 8     | 0.25                   | 2000                                    | NA      | 1                       | 4   | 4    |
| Zhong 2019      | Radial  | Pneumatic        | Swiss DolorClast                  | EMS, Switzerland                      | 8     | 0.2                    | 1000                                    | 0.2 bar | 1                       | 4   | 4    |
| Zhou 2019       | Focused | Electrohydraulic | GR-TT                             | Beijing Glory&Health Medical, China   | 5–10  | 0.09-0.25              | 3000                                    | NA      | 14 (2 sessions per day) | 1   | 14   |
| Zhu CY 2021     | Radial  | Pneumatic        | HEMA S1                           | Zhuhai Hema Medical Instrument, China | 6–15  | 0.2                    | 3000 (300 impulse/acupoint)             | NA      | 1                       | 3–6 | 3–6  |
| Zhu HM 2021     | Radial  | Pneumatic        | Swiss DolorClast Smart (FT-174)   | EMS, Switzerland                      | 6–8   | 0.06-0.13              | 1000–1500                               | NA      | 5                       | 2   | 10   |

<sup>a</sup>Data was reported in the unit of mJ/mm2 by the study; data reported in other units (e.g. bar, KV) was converted to mJ/mm2.

<sup>b</sup>TED = EFD × number of shockwave impulses.

CRT = CR Technology; EMS = Electro Medical Systems; HMT = High Medical Technology; DMT = Dornier MedTech; ZJAM = Zhongke Jian An Meditechs Company; EFD = energy flux density; TED = total energy dose (intensity × number of shockwave impulses); NR = not reported.

**Table S4.** Ratings of the PEDro classification scale.

| Study author (year)            | Overall <sup>a</sup> | Eligibility<br>criteria <sup>#</sup> | 1 <sup>b</sup> | 2 <sup>b</sup> | 3 <sup>b</sup> | 4 <sup>b</sup> | 5 <sup>b</sup> | 6 <sup>b</sup> | 7 <sup>b</sup> | 8 <sup>b</sup> | 9 <sup>b</sup> | 10 <sup>b</sup> |
|--------------------------------|----------------------|--------------------------------------|----------------|----------------|----------------|----------------|----------------|----------------|----------------|----------------|----------------|-----------------|
| Aletaibieke, 2016 <sup>¶</sup> | 8                    | X                                    | X              |                | X              | X              |                | X              | X              | X              | X              | X               |
| Ammar 2018                     | 5                    | X                                    | X              |                | X              |                |                | X              |                |                | X              | X               |
| Cai 2021                       | 6                    | X                                    | X              |                | X              |                |                |                | X              | X              | X              | X               |
| Chang 2021                     | 6                    | X                                    | X              |                | X              |                |                |                | X              | X              | X              | X               |
| Chen 2014                      | 7                    | X                                    | X              | X              | X              |                |                |                | X              | X              | X              | X               |
| Cho 2016                       | 8                    | X                                    | X              |                | X              | X              |                | X              | X              | X              | X              | X               |
| Cui 2015                       | 6                    | X                                    | X              |                | X              |                |                |                | X              | X              | X              | X               |
| Dou 2016                       | 6                    | X                                    | X              |                | X              |                |                |                | X              | X              | X              | X               |
| Ediz 2018                      | 8                    | X                                    | X              |                | X              | X              |                | X              | X              | X              | X              | X               |
| Eftekharsadat 2020             | 7                    | X                                    | X              | X              | X              |                |                | X              | X              |                | X              | X               |
| Elerian 2016                   | 9                    | X                                    | X              | X              | X              | X              |                | X              | X              | X              | X              | X               |
| Elgendy 2020                   | 7                    | X                                    | X              |                | X              |                |                | X              | X              | X              | X              | X               |
| El-Sakka 2019                  | 6                    | X                                    | X              |                | X              |                |                |                | X              | X              | X              | X               |
| Feng 2019                      | 6                    | X                                    | X              |                | X              |                |                |                | X              | X              | X              | X               |
| Gunaydin 2020                  | 6                    | X                                    | X              | X              | X              |                |                |                | X              |                | X              | X               |
| Guo 2019                       | 5                    | X                                    | X              |                | X              |                |                |                | X              |                | X              | X               |
| Hammam 2020 <sup>¶</sup>       | 9                    | X                                    | X              | X              | X              | X              |                | X              | X              | X              | X              | X               |
| He 2014                        | 6                    | X                                    | X              |                | X              |                |                |                | X              | X              | X              | X               |
| He 2016                        | 6                    | X                                    | X              |                | X              |                |                |                | X              | X              | X              | X               |
| He 2021                        | 6                    | X                                    | X              |                | X              |                |                |                | X              | X              | X              | X               |
| Imamura 2017                   | 9                    | X                                    | X              | X              | X              | X              |                | X              | X              | X              | X              | X               |
| Ji 2021                        | 6                    | X                                    | X              |                | X              |                |                |                | X              | X              | X              | X               |
| Jiang 2017                     | 6                    | X                                    | X              |                | X              |                |                |                | X              | X              | X              | X               |
| Kim 2015                       | 7                    | X                                    | X              | X              | X              |                |                |                | X              | X              | X              | X               |
| Kuang 2017                     | 6                    | X                                    | X              |                | X              |                |                |                | X              | X              | X              | X               |
| Li 2018                        | 6                    | X                                    | X              |                | X              |                |                |                | X              | X              | X              | X               |
| Li 2015                        | 6                    | X                                    | X              |                | X              |                |                |                | X              | X              | X              | X               |
| Li MZ 2020 <sup>¶</sup>        | 8                    | X                                    | X              |                | X              | X              |                | X              | X              | X              | X              | X               |
| Li RX 2021                     | 6                    | X                                    | X              |                | X              |                |                |                | X              | X              | X              | X               |
| Li 2017 <sup>¶</sup>           | 7                    | X                                    | X              |                | X              | X              |                | X              | X              |                | X              | X               |
| Liu 2020                       | 6                    | X                                    | X              |                | X              |                |                |                | X              | X              | X              | X               |
| Liu MY 2017 <sup>¶</sup>       | 8                    | X                                    | X              |                | X              | X              |                | X              | X              | X              | X              | X               |
| Liu WD 2017                    | 5                    | X                                    | X              |                | X              |                |                |                | X              |                | X              | X               |
| Liu 2016b                      | 6                    | X                                    | X              |                | X              |                |                |                | X              | X              | X              | X               |
| Liu YW 2018                    | 6                    | X                                    | X              |                | X              |                |                |                | X              | X              | X              | X               |
| Lizis 2017a                    | 8                    | X                                    | X              | X              | X              |                |                | X              | X              | X              | X              | X               |
| Lizis 2017b                    | 8                    | X                                    | X              | X              | X              |                |                | X              | X              | X              | X              | X               |
| Lizis 2018                     | 8                    | X                                    | X              | X              | X              |                |                | X              | X              | X              | X              | X               |
| Ma 2020                        | 6                    | X                                    | X              |                | X              |                |                |                | X              | X              | X              | X               |
| Qin 2018                       | 6                    | X                                    | X              |                | X              |                |                |                | X              | X              | X              | X               |
| Shen 2016                      | 6                    | X                                    | X              |                | X              |                |                |                | X              | X              | X              | X               |
| Shenouda 2013                  | 6                    | X                                    | X              |                | X              |                |                |                | X              | X              | X              | X               |
| Shi D 2020                     | 6                    | X                                    | X              |                | X              |                |                |                | X              | X              | X              | X               |
| Uysal 2020                     | 8                    | X                                    | X              |                | X              | X              |                | X              | X              | X              | X              | X               |
| Wang AH 2021                   | 6                    | X                                    | X              |                | X              |                |                |                | X              | X              | X              | X               |
| Wang HR 2020                   | 6                    | X                                    | X              |                | X              |                |                |                | X              | X              | X              | X               |
| Wang 2016                      | 6                    | X                                    | X              |                | X              |                |                |                | X              | X              | X              | X               |
| Wang TS 2020                   | 9                    | X                                    | X              |                | X              | X              | X              | X              | X              | X              | X              | X               |
| Wang YY 2020                   | 6                    | X                                    | X              |                | X              |                |                |                | X              | X              | X              | X               |
| Wu 2014                        | 7                    | X                                    | X              | X              | X              |                |                | X              | X              |                | X              | X               |
| Xiao 2021                      | 6                    | X                                    | X              |                | X              |                |                |                | X              | X              | X              | X               |
| Xie 2019                       | 6                    | X                                    | X              |                | X              |                |                |                | X              | X              | X              | X               |
| Xing 2018                      | 6                    | X                                    | X              |                | X              |                |                |                | X              | X              | X              | X               |
| Yang 2017                      | 7                    | X                                    | X              |                | X              |                |                | X              | X              | X              | X              | X               |
| Yang 2021                      | 6                    | X                                    | X              |                | X              |                |                |                | X              | X              | X              | X               |
| Yu 2008 <sup>¶</sup>           | 7                    | X                                    | X              |                | X              | X              |                | X              | X              |                | X              | X               |
| Yu 2019                        | 6                    | X                                    | X              |                | X              |                |                |                | X              | X              | X              | X               |
| Zhang 2017                     | 6                    | X                                    | X              |                | X              |                |                |                | X              | X              | X              | X               |
| Zhang XG 2016                  | 6                    | X                                    | X              |                | X              |                |                |                | X              | X              | X              | X               |

|                         |   |    |    |    |    |    |   |    |    |    |    |    |
|-------------------------|---|----|----|----|----|----|---|----|----|----|----|----|
| Zhang Y 2016            | 6 | X  | X  |    | X  |    |   |    | X  | X  | X  | X  |
| Zhang 2020              | 5 | X  | X  |    | X  |    |   |    | X  |    | X  | X  |
| Zhang 2021 <sup>¶</sup> | 9 | X  | X  | X  | X  | X  |   | X  | X  | X  | X  | X  |
| Zhao 2016 <sup>¶</sup>  | 8 | X  | X  |    | X  | X  |   | X  | X  | X  | X  | X  |
| Zhao 2013; 2014         | 9 | X  | X  | X  | X  | X  |   | X  | X  | X  | X  | X  |
| Zheng 2021              | 6 | X  | X  |    | X  |    |   |    | X  | X  | X  | X  |
| Zhong 2019              | 9 | X  | X  |    | X  | X  | X | X  | X  | X  | X  | X  |
| Zhou 2019               | 6 | X  | X  |    | X  |    |   |    | X  | X  | X  | X  |
| Zhu CY 2021             | 6 | X  | X  |    | X  |    |   |    | X  | X  | X  | X  |
| Zhu HM 2021             | 6 | X  | X  |    | X  |    |   |    | X  | X  | X  | X  |
| Summary*                |   | 69 | 69 | 13 | 69 | 16 | 2 | 24 | 68 | 60 | 69 | 69 |

PEDro = Physiotherapy Evidence Database.

<sup>#</sup>Not used to calculate the total score.

<sup>¶</sup>Score was determined by a third assessor.

\*Calculated as the number of studies that satisfied the criteria.

<sup>a</sup>Points of methodological quality are denoted as “X” for fulfilled criteria.

<sup>b</sup>PEDro classification scale: 1 = random allocation, 2 = concealed allocation, 3 = similarity at the baseline, 4 = subject blinding, 5 = therapist blinding, 6 = assessor blinding, 7 = over 85% follow-up for at least one key outcome, 8 = intention-to-treat analysis, 9 = between-group statistical comparison for at least one key outcome, 10 = point and variability measures for at least one key outcome. Methodological quality: 9–10: excellent; 6–8: good; 4–5: fair; <4: poor.

**Table S5.** Direct pairwise comparison and network meta-analysis of mean change in pain score from baseline.

| Relative effects of NMA | Direct evidence of pairwise meta-analyses |                          |                      |                     |                      |                     |                      |                      |                      |                     |                      |                          |                     |                     |                      |                     |                      |                      |                      |                     |                      |                      |
|-------------------------|-------------------------------------------|--------------------------|----------------------|---------------------|----------------------|---------------------|----------------------|----------------------|----------------------|---------------------|----------------------|--------------------------|---------------------|---------------------|----------------------|---------------------|----------------------|----------------------|----------------------|---------------------|----------------------|----------------------|
|                         | V1                                        | V2                       | V3                   | V4                  | V5                   | V6                  | V7                   | V8                   | V9                   | V10                 | V11                  | V12                      | V13                 | V14                 | V15                  | V16                 | V17                  | V18                  | V19                  | V20                 | V21                  | V22                  |
| 1                       | MI-FoSW + CPT                             | .                        | .                    | .                   | -2.56 (-4.67, -0.45) | .                   | .                    | .                    | .                    | .                   | .                    | .                        | .                   | .                   | .                    | .                   | .                    | .                    | .                    | .                   | .                    | .                    |
| 2                       | -1.38 (-4.70, 1.93)                       | MI-RaSW (Acupoint) + TCM | .                    | .                   | .                    | .                   | .                    | .                    | .                    | .                   | .                    | -1.62 (-3.70, 0.45)      | .                   | .                   | .                    | .                   | -1.82 (-3.91, 0.27)  | .                    | .                    | .                   | .                    | .                    |
| 3                       | -2.22 (-4.76, 0.32)                       | -0.84 (-3.39, 1.71)      | HI-RaSW + TCM        | .                   | .                    | .                   | .                    | .                    | -1.71 (-2.91, -0.51) | .                   | .                    | .                        | .                   | .                   | .                    | .                   | .                    | .                    | .                    | .                   | .                    | -1.28 (-2.47, -0.09) |
| 4                       | -2.28 (-5.54, 0.97)                       | -0.90 (-4.16, 2.36)      | -0.06 (-2.54, 2.41)  | LI-FoSW + CPT       | .                    | .                   | .                    | .                    | .                    | .                   | .                    | .                        | .                   | .                   | .                    | .                   | .                    | .                    | .                    | .                   | .                    | -2.23 (-4.49, 0.04)  |
| 5                       | -2.56 (-4.67, -0.45)                      | -1.18 (-3.73, 1.38)      | -0.34 (-1.75, 1.07)  | -0.28 (-2.75, 2.19) | MI-FoSW              | .                   | 0.91 (-1.20, 3.02)   | .                    | .                    | .                   | .                    | .                        | .                   | .                   | .                    | -0.55 (-2.65, 1.54) | .                    | .                    | .                    | .                   | .                    | -1.98 (-3.03, -0.92) |
| 6                       | -2.42 (-5.57, 0.73)                       | -1.03 (-4.19, 2.12)      | -0.20 (-2.53, 2.14)  | -0.13 (-3.23, 2.96) | 0.14 (-2.19, 2.48)   | MI-RaSW + TCM       | .                    | .                    | .                    | .                   | .                    | .                        | .                   | .                   | .                    | .                   | .                    | .                    | .                    | .                   | .                    | -2.09 (-4.20, 0.02)  |
| 7                       | -2.58 (-5.42, 0.26)                       | -1.19 (-4.21, 1.83)      | -0.36 (-2.50, 1.79)  | -0.29 (-3.25, 2.66) | -0.01 (-1.91, 1.88)  | -0.16 (-2.99, 2.68) | MI-FoSW + TCM        | .                    | .                    | .                   | .                    | .                        | .                   | .                   | .                    | .                   | .                    | .                    | .                    | .                   | .                    | -1.01 (-3.12, 1.10)  |
| 8                       | -2.77 (-5.29, -0.25)                      | -1.39 (-3.91, 1.14)      | -0.55 (-1.91, 0.82)  | -0.49 (-2.94, 1.97) | -0.21 (-1.59, 1.18)  | -0.35 (-2.67, 1.96) | -0.19 (-2.32, 1.93)  | HI-RaSW + CPT        | -1.16 (-3.27, 0.96)  | .                   | .                    | .                        | .                   | .                   | .                    | .                   | .                    | .                    | .                    | .                   | -0.03 (-2.11, 2.05)  | -2.20 (-3.30, -1.09) |
| 9                       | -2.87 (-5.27, -0.47)                      | -1.49 (-3.89, 0.92)      | -0.65 (-1.65, 0.35)  | -0.59 (-2.91, 1.74) | -0.31 (-1.45, 0.83)  | -0.45 (-2.63, 1.73) | -0.29 (-2.27, 1.68)  | -0.10 (-1.15, 0.95)  | HI-RaSW              | .                   | -0.48 (-1.95, 1.00)  | .                        | .                   | .                   | .                    | .                   | .                    | .                    | .                    | .                   | -2.89 (-4.41, -1.38) | -1.68 (-2.29, -1.07) |
| 10                      | -2.85 (-6.00, 0.30)                       | -1.46 (-4.62, 1.70)      | -0.62 (-2.96, 1.71)  | -0.56 (-3.66, 2.54) | -0.28 (-2.62, 2.06)  | -0.43 (-3.41, 2.56) | -0.27 (-3.11, 2.57)  | -0.08 (-2.40, 2.25)  | 0.03 (-2.16, 2.21)   | HI-FoSW + TCM       | .                    | .                        | .                   | .                   | .                    | .                   | .                    | .                    | .                    | .                   | .                    | -1.67 (-3.78, 0.45)  |
| 11                      | -2.90 (-5.36, -0.45)                      | -1.52 (-3.92, 0.88)      | -0.68 (-1.90, 0.54)  | -0.62 (-3.00, 1.76) | -0.34 (-1.59, 0.91)  | -0.48 (-2.72, 1.75) | -0.33 (-2.36, 1.71)  | -0.13 (-1.32, 1.06)  | -0.03 (-0.89, 0.82)  | -0.06 (-2.30, 2.18) | MI-RaSW              | .                        | .                   | .                   | .                    | .                   | 0.36 (-1.73, 2.44)   | .                    | .                    | .                   | -2.43 (-3.93, -0.94) | -1.64 (-2.60, -0.69) |
| 12                      | -3.01 (-6.92, 0.90)                       | -1.62 (-3.70, 0.45)      | -0.79 (-4.07, 2.50)  | -0.72 (-4.59, 3.14) | -0.45 (-3.74, 2.85)  | -0.59 (-4.37, 3.19) | -0.43 (-4.10, 3.23)  | -0.24 (-3.51, 3.03)  | -0.14 (-3.31, 3.03)  | -0.16 (-3.95, 3.62) | -0.11 (-3.28, 3.07)  | MI-RaSW (Acupoint) + CPT | .                   | .                   | .                    | .                   | .                    | .                    | .                    | .                   | .                    | .                    |
| 13                      | -3.12 (-6.25, 0.01)                       | -1.73 (-4.87, 1.40)      | -0.90 (-3.20, 1.41)  | -0.84 (-3.91, 2.24) | -0.56 (-2.86, 1.75)  | -0.70 (-3.66, 2.26) | -0.54 (-3.36, 2.27)  | -0.35 (-2.64, 1.94)  | -0.25 (-2.40, 1.90)  | -0.27 (-3.24, 2.69) | -0.22 (-2.43, 1.99)  | -0.11 (-3.87, 3.65)      | HI-FoSW + CPT       | .                   | .                    | .                   | .                    | .                    | .                    | .                   | .                    | -1.39 (-3.47, 0.69)  |
| 14                      | -3.14 (-6.27, -0.01)                      | -1.76 (-4.90, 1.38)      | -0.92 (-3.23, 1.39)  | -0.86 (-3.94, 2.22) | -0.58 (-2.89, 1.73)  | -0.72 (-3.69, 2.24) | -0.57 (-3.38, 2.25)  | -0.37 (-2.67, 1.92)  | -0.27 (-2.43, 1.88)  | -0.30 (-3.27, 2.67) | -0.24 (-2.46, 1.98)  | -0.13 (-3.90, 3.63)      | -0.02 (-2.97, 2.92) | LI-FoSW + TCM       | .                    | .                   | .                    | .                    | .                    | .                   | .                    | -1.37 (-3.46, 0.72)  |
| 15                      | -3.14 (-5.81, -0.46)                      | -1.75 (-4.40, 0.90)      | -0.91 (-2.55, 0.72)  | -0.85 (-3.47, 1.76) | -0.57 (-2.22, 1.08)  | -0.72 (-3.20, 1.77) | -0.56 (-2.86, 1.75)  | -0.37 (-1.94, 1.21)  | -0.26 (-1.66, 1.13)  | -0.29 (-2.78, 2.20) | -0.23 (-1.69, 1.23)  | -0.13 (-3.49, 3.24)      | -0.02 (-2.47, 2.44) | 0.01 (-2.46, 2.47)  | LI-RaSW + TCM        | .                   | .                    | .                    | .                    | .                   | -1.42 (-2.91, 0.07)  | -1.21 (-3.30, 0.88)  |
| 16                      | -3.23 (-5.88, -0.57)                      | -1.84 (-4.70, 1.02)      | -1.00 (-2.91, 0.91)  | -0.94 (-3.73, 1.85) | -0.66 (-2.27, 0.94)  | -0.81 (-3.47, 1.86) | -0.65 (-3.04, 1.74)  | -0.46 (-2.35, 1.43)  | -0.36 (-2.07, 1.36)  | -0.38 (-3.05, 2.29) | -0.32 (-2.12, 1.47)  | -0.22 (-3.75, 3.32)      | -0.11 (-2.75, 2.53) | -0.08 (-2.73, 2.56) | -0.09 (-2.18, 2.00)  | LI-FoSW             | .                    | .                    | .                    | .                   | .                    | -1.16 (-3.42, 1.11)  |
| 17                      | -3.20 (-5.78, -0.63)                      | -1.82 (-3.91, 0.27)      | -0.98 (-2.44, 0.48)  | -0.92 (-3.43, 1.59) | -0.64 (-2.11, 0.83)  | -0.79 (-3.15, 1.58) | -0.63 (-2.81, 1.55)  | -0.43 (-1.85, 0.98)  | -0.33 (-1.52, 0.85)  | -0.36 (-2.73, 2.01) | -0.30 (-1.48, 0.88)  | -0.20 (-3.14, 2.75)      | -0.09 (-2.43, 2.26) | -0.06 (-2.41, 2.29) | -0.07 (-1.70, 1.56)  | 0.02 (-1.93, 1.98)  | MI-RaSW (Acupoint)   | .                    | .                    | .                   | -1.40 (-3.49, 0.69)  | -0.92 (-2.38, 0.55)  |
| 18                      | -3.31 (-5.83, -0.79)                      | -1.92 (-4.46, 0.61)      | -1.08 (-2.46, 0.29)  | -1.02 (-3.47, 1.43) | -0.74 (-2.12, 0.63)  | -0.89 (-3.20, 1.42) | -0.73 (-2.85, 1.39)  | -0.54 (-1.88, 0.81)  | -0.44 (-1.53, 0.65)  | -0.46 (-2.78, 1.85) | -0.40 (-1.61, 0.80)  | -0.30 (-3.57, 2.98)      | -0.19 (-2.47, 2.10) | -0.16 (-2.45, 2.13) | -0.17 (-1.79, 1.44)  | -0.08 (-1.96, 1.80) | -0.10 (-1.53, 1.33)  | HI-FoSW              | .                    | .                   | .                    | -1.21 (-2.15, -0.26) |
| 19                      | -3.33 (-5.79, -0.88)                      | -1.95 (-4.40, 0.51)      | -1.11 (-2.36, 0.14)  | -1.05 (-3.44, 1.34) | -0.77 (-2.03, 0.49)  | -0.91 (-3.16, 1.33) | -0.76 (-2.80, 1.29)  | -0.56 (-1.76, 0.64)  | -0.46 (-1.39, 0.46)  | -0.49 (-2.74, 1.76) | -0.43 (-1.47, 0.61)  | -0.32 (-3.54, 2.89)      | -0.21 (-2.43, 2.00) | -0.19 (-2.41, 2.03) | -0.20 (-1.65, 1.26)  | -0.11 (-1.91, 1.69) | -0.13 (-1.42, 1.16)  | -0.03 (-1.24, 1.19)  | MI-RaSW + CPT        | -1.59 (-3.77, 0.59) | -1.51 (-2.99, -0.03) | -1.01 (-1.88, -0.15) |
| 20                      | -3.55 (-6.28, -0.81)                      | -2.16 (-4.91, 0.59)      | -1.32 (-3.06, 0.42)  | -1.26 (-3.94, 1.41) | -0.98 (-2.73, 0.76)  | -1.13 (-3.67, 1.42) | -0.97 (-3.34, 1.41)  | -0.78 (-2.49, 0.94)  | -0.68 (-2.20, 0.85)  | -0.70 (-3.25, 1.85) | -0.64 (-2.25, 0.97)  | -0.54 (-3.98, 2.91)      | -0.43 (-2.95, 2.10) | -0.40 (-2.93, 2.13) | -0.41 (-2.34, 1.51)  | -0.32 (-2.49, 1.85) | -0.34 (-2.12, 1.44)  | -0.24 (-1.95, 1.47)  | -0.21 (-1.73, 1.30)  | LI-RaSW + CPT       | .                    | -1.53 (-3.06, 0.01)  |
| 21                      | -4.47 (-6.93, -2.02)                      | -3.09 (-5.49, -0.69)     | -2.25 (-3.47, -1.02) | -2.19 (-4.57, 0.20) | -1.91 (-3.16, -0.66) | -2.05 (-4.29, 0.18) | -1.89 (-3.93, 0.15)  | -1.70 (-2.81, -0.59) | -1.60 (-2.46, -0.74) | -1.63 (-3.87, 0.62) | -1.57 (-2.51, -0.62) | -1.46 (-4.63, 1.71)      | -1.35 (-3.56, 0.86) | -1.33 (-3.55, 0.89) | -1.34 (-2.58, -0.10) | -1.25 (-3.04, 0.55) | -1.27 (-2.45, -0.09) | -1.17 (-2.37, 0.04)  | -1.14 (-2.07, -0.21) | -0.93 (-2.51, 0.66) | LI-RaSW              | -1.09 (-2.57, 0.40)  |
| 22                      | -4.51 (-6.85, -2.18)                      | -3.13 (-5.48, -0.78)     | -2.29 (-3.29, -1.29) | -2.23 (-4.49, 0.04) | -1.95 (-2.95, -0.95) | -2.09 (-4.20, 0.02) | -1.93 (-3.83, -0.04) | -1.74 (-2.70, -0.78) | -1.64 (-2.19, -1.10) | -1.67 (-3.78, 0.45) | -1.61 (-2.36, -0.86) | -1.50 (-4.64, 1.63)      | -1.39 (-3.47, 0.69) | -1.37 (-3.46, 0.72) | -1.38 (-2.69, -0.07) | -1.29 (-2.91, 0.34) | -1.31 (-2.39, -0.23) | -1.21 (-2.15, -0.26) | -1.18 (-1.94, -0.41) | -0.97 (-2.39, 0.46) | -0.04 (-0.79, 0.71)  | UC                   |

Pairwise (upper right portion) and network (lower left portion) meta-analysis results are presented for mean change (from baseline) in pain outcomes. Interventions are reported in order of efficacy ranked according to P scores. Effect estimation is presented in standardized mean difference (SMD) with 95% CI. Significant results are marked in red.

NMA, network meta-analysis; FoSW, focused shock wave; RaSW, radial shock wave; HI, high energy; MI, medium energy; LI, low energy; CPT, conventional physical therapy; TCM, traditional Chinese medicine; UC, usual care.



**Table S6.** Direct pairwise comparison and network meta-analysis of mean change in global function from baseline.

| Relative effects of NMA | Direct evidence of pairwise meta-analyses |                          |                    |                    |                     |                    |                    |                    |                     |                    |                    |                    |                    |                     |                    |                     |                    |                    |                     |                    |                     |
|-------------------------|-------------------------------------------|--------------------------|--------------------|--------------------|---------------------|--------------------|--------------------|--------------------|---------------------|--------------------|--------------------|--------------------|--------------------|---------------------|--------------------|---------------------|--------------------|--------------------|---------------------|--------------------|---------------------|
|                         | V1                                        | V2                       | V3                 | V4                 | V5                  | V6                 | V7                 | V8                 | V9                  | V10                | V11                | V12                | V13                | V14                 | V15                | V16                 | V17                | V18                | V19                 | V20                | V21                 |
| 1                       | MI-RaSW (Acupoint) + TCM                  | 0.85 (-1.42, 3.12)       | .                  | 2.33 (0.03, 4.63)  | .                   | .                  | .                  | .                  | .                   | .                  | .                  | .                  | .                  | .                   | .                  | .                   | .                  | .                  | .                   | .                  | .                   |
| 2                       | 0.85 (-1.42, 3.12)                        | MI-RaSW (Acupoint) + CPT | .                  | .                  | .                   | .                  | .                  | .                  | .                   | .                  | .                  | .                  | .                  | .                   | .                  | .                   | .                  | .                  | .                   | .                  | .                   |
| 3                       | 2.29 (-0.53, 5.12)                        | 1.45 (-2.18, 5.07)       | HI-RaSW + TCM      | .                  | .                   | .                  | .                  | .                  | .                   | .                  | 1.44 (0.12, 2.75)  | .                  | .                  | .                   | .                  | .                   | .                  | .                  | .                   | .                  | 1.88 (0.57, 3.19)   |
| 4                       | 2.33 (0.03, 4.63)                         | 1.49 (-1.75, 4.72)       | 0.04 (-1.60, 1.68) | MI-RaSW (Acupoint) | 1.29 (-0.32, 2.90)  | .                  | .                  | .                  | .                   | .                  | .                  | .                  | .                  | .                   | .                  | .                   | .                  | 1.54 (-0.75, 3.84) | .                   | .                  | 1.01 (-1.27, 3.28)  |
| 5                       | 2.69 (0.09, 5.29)                         | 1.84 (-1.61, 5.29)       | 0.39 (-0.95, 1.74) | 0.35 (-0.86, 1.57) | MI-RaSW             | .                  | .                  | .                  | .                   | .                  | 0.12 (-1.49, 1.73) | .                  | .                  | .                   | .                  | .                   | .                  | 1.11 (-0.52, 2.74) | .                   | .                  | 2.79 (1.72, 3.86)   |
| 6                       | 2.50 (-1.17, 6.18)                        | 1.66 (-2.66, 5.98)       | 0.21 (-2.59, 3.01) | 0.17 (-2.69, 3.04) | -0.18 (-2.89, 2.53) | MI-FoSW + CPT      | .                  | .                  | .                   | .                  | .                  | 0.85 (-1.43, 3.13) | .                  | .                   | .                  | .                   | .                  | .                  | .                   | .                  | .                   |
| 7                       | 2.82 (-0.65, 6.30)                        | 1.98 (-2.18, 6.13)       | 0.53 (-2.01, 3.06) | 0.49 (-2.12, 3.10) | 0.14 (-2.30, 2.57)  | 0.32 (-3.13, 3.77) | HI-FoSW + CPT      | .                  | .                   | .                  | .                  | .                  | .                  | .                   | .                  | .                   | .                  | .                  | .                   | .                  | 1.97 (-0.32, 4.26)  |
| 8                       | 3.08 (0.29, 5.88)                         | 2.24 (-1.36, 5.84)       | 0.79 (-0.70, 2.28) | 0.75 (-0.84, 2.34) | 0.40 (-0.90, 1.69)  | 0.58 (-2.20, 3.36) | 0.26 (-2.25, 2.77) | HI-RaSW + CPT      | .                   | .                  | 3.32 (0.96, 5.69)  | .                  | .                  | .                   | .                  | .                   | .                  | 0.69 (-1.60, 2.98) | .                   | .                  | 1.61 (0.43, 2.80)   |
| 9                       | 3.16 (0.45, 5.87)                         | 2.31 (-1.22, 5.85)       | 0.87 (-0.47, 2.20) | 0.83 (-0.61, 2.26) | 0.47 (-0.63, 1.58)  | 0.66 (-2.04, 3.35) | 0.34 (-2.08, 2.76) | 0.08 (-1.20, 1.35) | MI-RaSW + CPT       | .                  | .                  | .                  | .                  | .                   | .                  | .                   | 1.46 (-0.91, 3.83) | 1.94 (0.31, 3.57)  | -0.95 (-3.23, 1.33) | .                  | 1.61 (0.73, 2.49)   |
| 10                      | 3.16 (0.05, 6.27)                         | 2.31 (-1.54, 6.17)       | 0.87 (-1.25, 2.98) | 0.83 (-1.27, 2.92) | 0.47 (-1.45, 2.40)  | 0.66 (-2.51, 3.82) | 0.34 (-2.60, 3.27) | 0.08 (-1.96, 2.11) | -0.00 (-1.92, 1.91) | LI-RaSW + TCM      | .                  | .                  | .                  | .                   | .                  | .                   | .                  | 1.13 (-0.50, 2.75) | .                   | .                  | .                   |
| 11                      | 3.25 (0.59, 5.91)                         | 2.41 (-1.09, 5.90)       | 0.96 (-0.13, 2.05) | 0.92 (-0.42, 2.26) | 0.57 (-0.37, 1.50)  | 0.75 (-1.89, 3.39) | 0.43 (-1.93, 2.79) | 0.17 (-0.97, 1.31) | 0.09 (-0.87, 1.05)  | 0.09 (-1.79, 1.98) | HI-RaSW            | .                  | .                  | .                   | .                  | .                   | .                  | 0.98 (-0.66, 2.61) | .                   | .                  | 1.65 (1.01, 2.29)   |
| 12                      | 3.35 (0.47, 6.23)                         | 2.51 (-1.16, 6.17)       | 1.06 (-0.56, 2.68) | 1.02 (-0.71, 2.75) | 0.67 (-0.79, 2.12)  | 0.85 (-1.43, 3.13) | 0.53 (-2.06, 3.11) | 0.27 (-1.32, 1.86) | 0.19 (-1.24, 1.63)  | 0.19 (-2.00, 2.39) | 0.10 (-1.23, 1.43) | MI-FoSW            | .                  | -1.04 (-3.35, 1.27) | .                  | .                   | .                  | .                  | .                   | 1.39 (-0.91, 3.70) | 1.56 (0.23, 2.88)   |
| 13                      | 3.38 (0.56, 6.19)                         | 2.53 (-1.08, 6.15)       | 1.08 (-0.42, 2.59) | 1.05 (-0.58, 2.67) | 0.69 (-0.63, 2.02)  | 0.87 (-1.90, 3.65) | 0.56 (-1.96, 3.07) | 0.29 (-1.17, 1.76) | 0.22 (-1.08, 1.52)  | 0.22 (-1.89, 2.33) | 0.13 (-1.06, 1.31) | 0.03 (-1.56, 1.61) | HI-FoSW            | .                   | .                  | .                   | .                  | .                  | .                   | .                  | 1.41 (0.38, 2.45)   |
| 14                      | 3.49 (0.58, 6.41)                         | 2.65 (-1.05, 6.34)       | 1.20 (-0.48, 2.88) | 1.16 (-0.63, 2.95) | 0.81 (-0.72, 2.33)  | 0.99 (-1.79, 3.77) | 0.67 (-1.95, 3.29) | 0.41 (-1.24, 2.06) | 0.33 (-1.17, 1.84)  | 0.33 (-1.90, 2.57) | 0.24 (-1.16, 1.65) | 0.14 (-1.44, 1.73) | 0.12 (-1.53, 1.76) | MI-FoSW + TCM       | .                  | .                   | .                  | .                  | .                   | .                  | 1.03 (-0.30, 2.35)  |
| 15                      | 3.86 (0.32, 7.40)                         | 3.01 (-1.19, 7.22)       | 1.57 (-1.06, 4.19) | 1.53 (-1.16, 4.22) | 1.17 (-1.35, 3.70)  | 1.36 (-2.16, 4.87) | 1.04 (-2.27, 4.34) | 0.78 (-1.82, 3.38) | 0.70 (-1.81, 3.21)  | 0.70 (-2.31, 3.71) | 0.61 (-1.85, 3.06) | 0.51 (-2.16, 3.18) | 0.48 (-2.12, 3.08) | 0.37 (-2.34, 3.07)  | LI-FoSW + CPT      | .                   | .                  | .                  | .                   | .                  | 0.93 (-1.45, 3.32)  |
| 16                      | 4.04 (0.56, 7.53)                         | 3.20 (-0.96, 7.36)       | 1.75 (-0.79, 4.29) | 1.71 (-0.90, 4.33) | 1.36 (-1.08, 3.80)  | 1.54 (-1.91, 4.99) | 1.22 (-2.02, 4.46) | 0.96 (-1.56, 3.48) | 0.88 (-1.54, 3.31)  | 0.89 (-2.06, 3.83) | 0.79 (-1.58, 3.16) | 0.69 (-1.90, 3.29) | 0.67 (-1.85, 3.19) | 0.55 (-2.08, 3.18)  | 0.18 (-3.13, 3.50) | HI-FoSW + TCM       | .                  | .                  | .                   | .                  | 0.75 (-1.55, 3.05)  |
| 17                      | 3.95 (0.91, 6.99)                         | 3.10 (-0.69, 6.89)       | 1.65 (-0.24, 3.55) | 1.62 (-0.37, 3.60) | 1.26 (-0.49, 3.01)  | 1.45 (-1.56, 4.45) | 1.13 (-1.64, 3.89) | 0.87 (-1.00, 2.73) | 0.79 (-0.84, 2.42)  | 0.79 (-1.60, 3.17) | 0.70 (-0.96, 2.35) | 0.60 (-1.36, 2.56) | 0.57 (-1.29, 2.43) | 0.45 (-1.56, 2.47)  | 0.09 (-2.76, 2.93) | -0.10 (-2.87, 2.68) | LI-RaSW + CPT      | .                  | .                   | .                  | 1.22 (-0.45, 2.89)  |
| 18                      | 4.29 (1.63, 6.94)                         | 3.44 (-0.05, 6.93)       | 1.99 (0.63, 3.35)  | 1.96 (0.63, 3.28)  | 1.60 (0.56, 2.64)   | 1.78 (-0.93, 4.50) | 1.46 (-0.98, 3.91) | 1.20 (-0.02, 2.43) | 1.13 (0.11, 2.14)   | 1.13 (-0.50, 2.75) | 1.03 (0.08, 1.99)  | 0.94 (-0.54, 2.41) | 0.91 (-0.44, 2.25) | 0.79 (-0.75, 2.34)  | 0.43 (-2.11, 2.96) | 0.24 (-2.21, 2.70)  | 0.34 (-1.41, 2.09) | LI-RaSW            | .                   | .                  | 0.49 (-1.15, 2.12)  |
| 19                      | 4.66 (1.64, 7.69)                         | 3.82 (0.04, 7.60)        | 2.37 (0.50, 4.24)  | 2.33 (0.37, 4.29)  | 1.98 (0.25, 3.71)   | 2.16 (-0.83, 5.15) | 1.84 (-0.91, 4.59) | 1.58 (-0.26, 3.42) | 1.50 (-0.10, 3.11)  | 1.50 (-0.86, 3.87) | 1.41 (-0.22, 3.04) | 1.31 (-0.63, 3.25) | 1.29 (-0.56, 3.13) | 1.17 (-0.82, 3.16)  | 0.80 (-2.03, 3.63) | 0.62 (-2.14, 3.38)  | 0.72 (-1.43, 2.87) | 0.38 (-1.35, 2.10) | MI-RaSW + TCM       | .                  | -0.43 (-2.06, 1.20) |
| 20                      | 4.74 (1.57, 7.91)                         | 3.90 (0.00, 7.79)        | 2.45 (0.36, 4.54)  | 2.41 (0.23, 4.59)  | 2.06 (0.09, 4.02)   | 2.24 (-0.65, 5.12) | 1.92 (-0.98, 4.82) | 1.66 (-0.41, 3.72) | 1.58 (-0.37, 3.53)  | 1.58 (-0.98, 4.14) | 1.49 (-0.39, 3.37) | 1.39 (-0.38, 3.16) | 1.36 (-0.70, 3.43) | 1.25 (-0.88, 3.38)  | 0.88 (-2.10, 3.86) | 0.70 (-2.21, 3.61)  | 0.79 (-1.57, 3.16) | 0.45 (-1.53, 2.44) | 0.08 (-2.27, 2.42)  | LI-FoSW            | 0.06 (-2.37, 2.48)  |
| 21                      | 4.79 (2.17, 7.41)                         | 3.95 (0.48, 7.41)        | 2.50 (1.41, 3.59)  | 2.46 (1.21, 3.71)  | 2.11 (1.28, 2.93)   | 2.29 (-0.29, 4.87) | 1.97 (-0.32, 4.26) | 1.71 (0.67, 2.75)  | 1.63 (0.85, 2.42)   | 1.63 (-0.20, 3.47) | 1.54 (0.96, 2.12)  | 1.44 (0.24, 2.64)  | 1.41 (0.38, 2.45)  | 1.30 (0.02, 2.58)   | 0.93 (-1.45, 3.32) | 0.75 (-1.55, 3.05)  | 0.84 (-0.71, 2.39) | 0.51 (-0.35, 1.37) | 0.13 (-1.39, 1.65)  | 0.05 (-1.73, 1.84) | UC                  |

Pairwise (upper right portion) and network (lower left portion) meta-analysis results are presented for mean change (from baseline) in pain outcomes. Interventions are reported in order of efficacy ranked according to P scores. Effect estimation is presented in standardized mean difference (SMD) with 95% CI. Significant results are marked in red.

NMA, network meta-analysis; FoSW, focused shock wave; RaSW, radial shock wave; HI, high energy; MI, medium energy; LI, low energy; CPT, conventional physical therapy; TCM, traditional Chinese medicine; UC, usual care.

**Table S7.** Direct pairwise comparison and network meta-analysis for disease activity.

| Relative effects of NMA | Direct evidence of pairwise meta-analyses |                          |                     |                     |                     |                     |                     |                     |                      |
|-------------------------|-------------------------------------------|--------------------------|---------------------|---------------------|---------------------|---------------------|---------------------|---------------------|----------------------|
|                         | V1                                        | V2                       | V3                  | V4                  | V5                  | V6                  | V7                  | V8                  | V9                   |
| 1                       | HI-FoSW                                   | .                        | .                   | .                   | .                   | .                   | .                   | .                   | -5.21 (-7.43, -3.00) |
| 2                       | -3.00 (-7.62, 1.61)                       | MI-RaSW (Acupoint) + TCM | .                   | .                   | .                   | .                   | .                   | -1.47 (-4.34, 1.40) | .                    |
| 3                       | -3.82 (-8.43, 0.79)                       | -0.82 (-6.54, 4.90)      | MI-RaSW + TCM       | -0.45 (-3.32, 2.41) | .                   | .                   | .                   | .                   | .                    |
| 4                       | -4.28 (-7.89, -0.67)                      | -1.27 (-6.23, 3.68)      | -0.45 (-3.32, 2.41) | MI-RaSW             | .                   | .                   | .                   | .                   | -0.94 (-3.79, 1.92)  |
| 5                       | -4.40 (-7.81, -0.99)                      | -1.40 (-6.21, 3.41)      | -0.58 (-5.39, 4.23) | -0.13 (-3.99, 3.73) | HI-RaSW + TCM       | .                   | -0.47 (-3.31, 2.37) | .                   | -0.48 (-3.32, 2.36)  |
| 6                       | -4.43 (-8.04, -0.82)                      | -1.43 (-6.38, 3.53)      | -0.61 (-5.56, 4.35) | -0.15 (-4.19, 3.89) | -0.03 (-3.89, 3.83) | MI-RaSW + CPT       | .                   | .                   | -0.78 (-3.64, 2.07)  |
| 7                       | -4.54 (-7.30, -1.78)                      | -1.54 (-5.91, 2.83)      | -0.72 (-5.09, 3.65) | -0.27 (-3.56, 3.03) | -0.14 (-2.74, 2.46) | -0.11 (-3.41, 3.19) | HI-RaSW             | .                   | -0.67 (-2.32, 0.98)  |
| 8                       | -4.47 (-8.09, -0.86)                      | -1.47 (-4.34, 1.40)      | -0.65 (-5.60, 4.30) | -0.20 (-4.23, 3.84) | -0.07 (-3.93, 3.79) | -0.04 (-4.08, 4.00) | 0.07 (-3.23, 3.37)  | MI-RaSW (Acupoint)  | -0.74 (-3.60, 2.12)  |
| 9                       | -5.21 (-7.43, -3.00)                      | -2.21 (-6.26, 1.84)      | -1.39 (-5.43, 2.66) | -0.94 (-3.79, 1.92) | -0.81 (-3.41, 1.79) | -0.78 (-3.64, 2.07) | -0.67 (-2.32, 0.98) | -0.74 (-3.60, 2.12) | UC                   |

Pairwise (upper right portion) and network (lower left portion) meta-analysis results are presented for mean change (from baseline) in pain outcomes. Interventions are reported in order of efficacy ranked according to P scores. Effect estimation is presented in standardized mean difference (SMD) with 95% CI. Significant results are marked in red.

NMA, network meta-analysis; FoSW, focused shock wave; RaSW, radial shock wave; HI, high energy; MI, medium energy; CPT, conventional physical therapy; TCM, traditional Chinese medicine; UC, usual care.

**Table S8.** Associations of moderators with treatment efficiency for all outcome measures.

| Moderator                          | Knee pain <sup>a</sup> |        |        |        |                | Global function <sup>a</sup> |        |        |        |                | Disease activity <sup>a</sup> |         |        |         |                 |
|------------------------------------|------------------------|--------|--------|--------|----------------|------------------------------|--------|--------|--------|----------------|-------------------------------|---------|--------|---------|-----------------|
|                                    | N                      | B      | SE     | Median | 95% CI         | N                            | B      | SE     | Median | 95% CI         | N                             | B       | SE     | Median  | 95% CI          |
| Participant factor                 |                        |        |        |        |                |                              |        |        |        |                |                               |         |        |         |                 |
| Age                                | 61                     | 0.643  | 0.0024 | 0.641  | −0.296, 1.591  | 62                           | 0.031  | 0.0101 | 0.033  | −1.287, 1.301  | 11                            | 0.826   | 0.0641 | 0.937   | −6.993, 9.051   |
| BMI                                | 27                     | −0.502 | 0.0037 | −0.507 | −1.937, 0.963  | 28                           | −0.061 | 0.0096 | −0.047 | −1.273, 1.079  | 4                             | NA      |        |         |                 |
| Sex distribution <sup>b</sup>      | 58                     | 0.051  | 0.0060 | 0.056  | −0.708, 0.781  | 60                           | −0.252 | 0.0084 | −0.234 | −1.323, 0.805  | 11                            | 0.107   | 0.0720 | 0.510   | −10.205, 8.734  |
| Area of population <sup>c</sup>    | 62                     | 0.865  | 0.0065 | 0.860  | 0.070, 1.709   | 63                           | −0.294 | 0.0073 | −0.291 | −1.211, 0.640  | 11                            | 1.633   | 0.0028 | 0.158   | −0.443, 0.810   |
| Disease duration                   | 47                     | −0.091 | 0.0065 | −0.087 | −0.915, 0.699  | 48                           | 0.406  | 0.0096 | 0.396  | −0.829, 1.630  | 11                            | 5.195   | 0.194  | 2.786   | −12.536, 28.315 |
| Study design factor                |                        |        |        |        |                |                              |        |        |        |                |                               |         |        |         |                 |
| PEDro score                        | 62                     | −0.883 | 0.0020 | −0.881 | −1.681, −0.105 | 63                           | 0.849  | 0.0083 | 0.846  | −0.183, 1.893  | 11                            | −2.322  | 0.0513 | −2.442  | −8.588, 6.299   |
| Follow-up duration                 | 62                     | −0.327 | 0.0153 | −0.329 | −1.674, 0.999  | 63                           | 0.338  | 0.0104 | 0.339  | −0.960, 1.638  | 11                            | −6.979  | 0.2651 | 0.943   | −45.417, 7.100  |
| Intervention factor                |                        |        |        |        |                |                              |        |        |        |                |                               |         |        |         |                 |
| Wave <sup>d</sup>                  | 62                     | 4.372  | 0.1310 | 4.561  | −4.712, 13.468 | 63                           | −1.102 | 0.1201 | −0.164 | −11.421, 6.554 | 11                            | 16.335  | 0.2938 | 18.528  | −14.651, 47.504 |
| EFD                                | 61                     | −0.550 | 0.0155 | −0.563 | −1.619, 0.610  | 63                           | 0.548  | 0.0256 | 0.512  | −1.144, 2.517  | 10                            | −6.114  | 0.0971 | −3.547  | −17.113, 5.703  |
| Treatment composition <sup>e</sup> | 62                     | 0.492  | 0.0168 | 0.520  | −0.858, 1.697  | 63                           | −1.481 | 0.0210 | −1.488 | −2.891, 0.030  | 11                            | −12.170 | 0.1005 | −7.428  | −18.700, 4.214  |
| Treatment duration                 | 62                     | −0.190 | 0.0087 | −0.174 | −0.981, 0.534  | 63                           | 0.246  | 0.0083 | 0.229  | −0.778, 1.273  | 11                            | −7.193  | 0.5780 | −13.500 | −61.064, 41.787 |

<sup>a</sup>Data represents the change in effects associated with the moderator indicated. B, beta coefficient; SE, standard error; 95% CI, 95% credibility interval.

<sup>b</sup>The proportion of female participants in sample

<sup>c</sup>Code for regression model: Africa = 1; Asian = 2; Europe = 3.

<sup>d</sup>Code for regression model: focused shock wave = 1; radial shock wave = 2.

<sup>e</sup>Code for regression model: monotherapy= 1; combined treatment = 2.

BMI, body mass index; PEDro, Physiotherapy Evidence Database; EFD, energy flux density.

**Table S9.** Compliance and adverse events reported by the included trials.

| Study              | ESWT group      |                   |                 |                   |                 |                   | Comparator group       |      |      |
|--------------------|-----------------|-------------------|-----------------|-------------------|-----------------|-------------------|------------------------|------|------|
|                    | ESWT alone      |                   | ESWT + CPT      |                   | ESWT + TCM      |                   | Placebo or<br>Non-ESWT | CPT  | TCM  |
|                    | Related to ESWT | Unrelated to ESWT | Related to ESWT | Unrelated to ESWT | Related to ESWT | Unrelated to ESWT |                        |      |      |
| Aletaibieke, 2016  | NR              | NR                |                 |                   |                 |                   | NR                     |      |      |
| Ammar 2018         |                 |                   | X               | None              |                 |                   |                        | X    |      |
| Cai 2021           | None            | X                 |                 |                   |                 |                   | X                      |      |      |
| Chang 2021         | None            | X                 |                 |                   | None            | X                 |                        |      |      |
| Chen 2014          |                 |                   | X               | None              |                 |                   | X                      | X    |      |
| Cho 2016           | None            | None              |                 |                   |                 |                   | None                   |      |      |
| Cui 2015           | None            | None              |                 |                   | None            | None              |                        |      | None |
| Dou 2016           | NR              | NR                |                 |                   |                 |                   |                        | NR   |      |
| Ediz 2018          |                 |                   | None            | None              |                 |                   | None                   | None |      |
| Eftekharsadat 2020 |                 |                   | NR              | NR                |                 |                   |                        | NR   |      |
| Elerian 2016       | NR              | NR                |                 |                   |                 |                   | NR                     |      |      |
| Elgendy 2020       |                 |                   | NR              | NR                |                 |                   |                        | NR   |      |
| El-Sakka 2019      |                 |                   | NR              | NR                |                 |                   |                        | NR   |      |
| Feng 2019          | NR              | NR                |                 |                   | NR              | NR                |                        |      |      |
| Gunaydin 2020      |                 |                   | NR              | NR                |                 |                   |                        | NR   |      |
| Guo 2019           |                 |                   |                 |                   | NR              | NR                |                        |      | NR   |
| Hammam 2020        |                 |                   | NR              | NR                |                 |                   | NR                     | NR   |      |
| He 2014            |                 |                   | NR              | NR                |                 |                   |                        | NR   |      |
| He 2016            | NR              | NR                |                 |                   |                 |                   | NR                     |      |      |
| He 2021            | NR              | NR                |                 |                   |                 |                   | NR                     |      |      |
| Imamura 2017       | None            | None              |                 |                   |                 |                   | None                   |      |      |
| Ji 2021            | X               | None              |                 |                   |                 |                   | X                      |      |      |
| Jiang 2017         | NR              | NR                | NR              | NR                |                 |                   |                        | NR   |      |
| Kim 2015           | X               | None              |                 |                   |                 |                   | None                   |      |      |
| Kuang 2017         | X               | None              |                 |                   | None            | X                 |                        |      |      |
| Li 2018            |                 |                   |                 |                   | None            | X                 | X                      |      |      |
| Li 2015            | NR              | NR                |                 |                   |                 |                   |                        |      | NR   |
| Li MZ 2020         |                 |                   | NR              | NR                |                 |                   | NR                     | NR   |      |
| Li RX 2021         | NR              | NR                |                 |                   |                 |                   |                        | NR   |      |
| Li 2017            | X               | None              |                 |                   |                 |                   | X                      |      |      |
| Liu 2020           | X               | None              |                 |                   |                 |                   | None                   |      |      |
| Liu MY 2017        | NR              | NR                |                 |                   |                 |                   | NR                     |      |      |
| Liu WD 2017        | NR              | NR                |                 |                   |                 |                   |                        |      | NR   |
| Liu 2016b          | None            | None              |                 |                   |                 |                   | None                   |      |      |
| Liu YW 2018        |                 |                   |                 |                   | NR              | NR                | NR                     |      |      |
| Lizis 2017a        | None            | None              |                 |                   |                 |                   |                        | None |      |
| Lizis 2017b        | None            | None              |                 |                   |                 |                   |                        | None |      |
| Lizis 2018         | None            | None              |                 |                   |                 |                   |                        | None |      |
| Ma 2020            |                 |                   |                 |                   | NR              | NR                |                        |      | NR   |
| Qin 2018           | NR              | NR                |                 |                   |                 |                   |                        | NR   |      |
| Shen 2016          | NR              |                   |                 |                   |                 |                   |                        | NR   | NR   |
| Shenouda 2013      |                 |                   | NR              | NR                |                 |                   |                        | NR   |      |
| Shi D 2020         |                 |                   |                 |                   | NR              | NR                | NR                     |      |      |
| Uysal 2020         |                 |                   | NR              | NR                |                 |                   | NR                     | NR   |      |
| Wang AH 2021       |                 |                   | NR              | NR                |                 |                   |                        | NR   |      |
| Wang HR 2020       | NR              | NR                |                 |                   | NR              | NR                |                        |      |      |
| Wang 2016          | NR              | NR                |                 |                   |                 |                   |                        | NR   |      |
| Wang TS 2020       | NR              | NR                |                 |                   |                 |                   | NR                     |      |      |
| Wang YY 2020       | NR              | NR                |                 |                   |                 |                   |                        |      |      |
| Wu 2014            | X               | None              |                 |                   |                 |                   | X                      |      |      |
| Xiao 2021          |                 |                   | NR              | NR                |                 |                   |                        | NR   |      |
| Xie 2019           | NR              | NR                |                 |                   | NR              | NR                |                        |      | NR   |
| Xing 2018          | NR              | NR                |                 |                   |                 |                   | NR                     |      |      |

*To be continued.*

Table S9. Continued.

| Study           | ESWT group      |                   |                 |                   |                 |                   | Comparator group       |      |      |
|-----------------|-----------------|-------------------|-----------------|-------------------|-----------------|-------------------|------------------------|------|------|
|                 | ESWT alone      |                   | ESWT + CPT      |                   | ESWT + TCM      |                   | Placebo or<br>Non-ESWT | CPT  | TCM  |
|                 | Related to ESWT | Unrelated to ESWT | Related to ESWT | Unrelated to ESWT | Related to ESWT | Unrelated to ESWT |                        |      |      |
| Yang 2017       |                 |                   | NR              | NR                | NR              | NR                |                        | NR   | NR   |
| Yang 2021       |                 |                   |                 |                   | None            | None              |                        | None | None |
| Yu 2008         | NR              | NR                |                 |                   |                 |                   | NR                     |      |      |
| Yu 2019         | NR              | NR                |                 |                   |                 |                   |                        |      |      |
| Zhang 2017      |                 |                   | X               | None              |                 |                   |                        | X    |      |
| Zhang XG 2016   | NR              | NR                |                 |                   |                 |                   |                        |      |      |
| Zhang Y 2016    |                 |                   |                 |                   | NR              | NR                | NR                     |      |      |
| Zhang 2020      | NR              | NR                |                 |                   |                 |                   | NR                     |      |      |
| Zhang 2021      | None            | None              |                 |                   |                 |                   | None                   |      |      |
| Zhao 2016       | NR              | NR                |                 |                   |                 |                   | NR                     |      |      |
| Zhao 2013; 2014 | None            | None              |                 |                   |                 |                   | X                      |      |      |
| Zheng 2021      | NR              | NR                |                 |                   |                 |                   | NR                     |      |      |
| Zhong 2019      |                 |                   | X               | X                 |                 |                   |                        | X    |      |
| Zhou 2019       | NR              | NR                | NR              | NR                |                 |                   |                        |      |      |
| Zhu CY 2021     |                 |                   | NR              | NR                | NR              | NR                |                        |      |      |
| Zhu HM 2021     | None            | X                 |                 |                   | None            | X                 |                        |      |      |

<sup>a</sup>The occurrence of adverse events is denoted as "X"; NR = data of the complications or adverse events were not reported.
