# Supplementary material for: Relative Effect of Extracorporeal Shockwave Therapy Alone or in Combination with Noninjective Treatments on Pain and Physical Function in Knee Osteoarthritis: A Network Meta-Analysis of Randomized Controlled Trials
Source: MDPI journal article supplement (doi:10.3390/biomedicines10020306), 2022-01-28

Figure S1

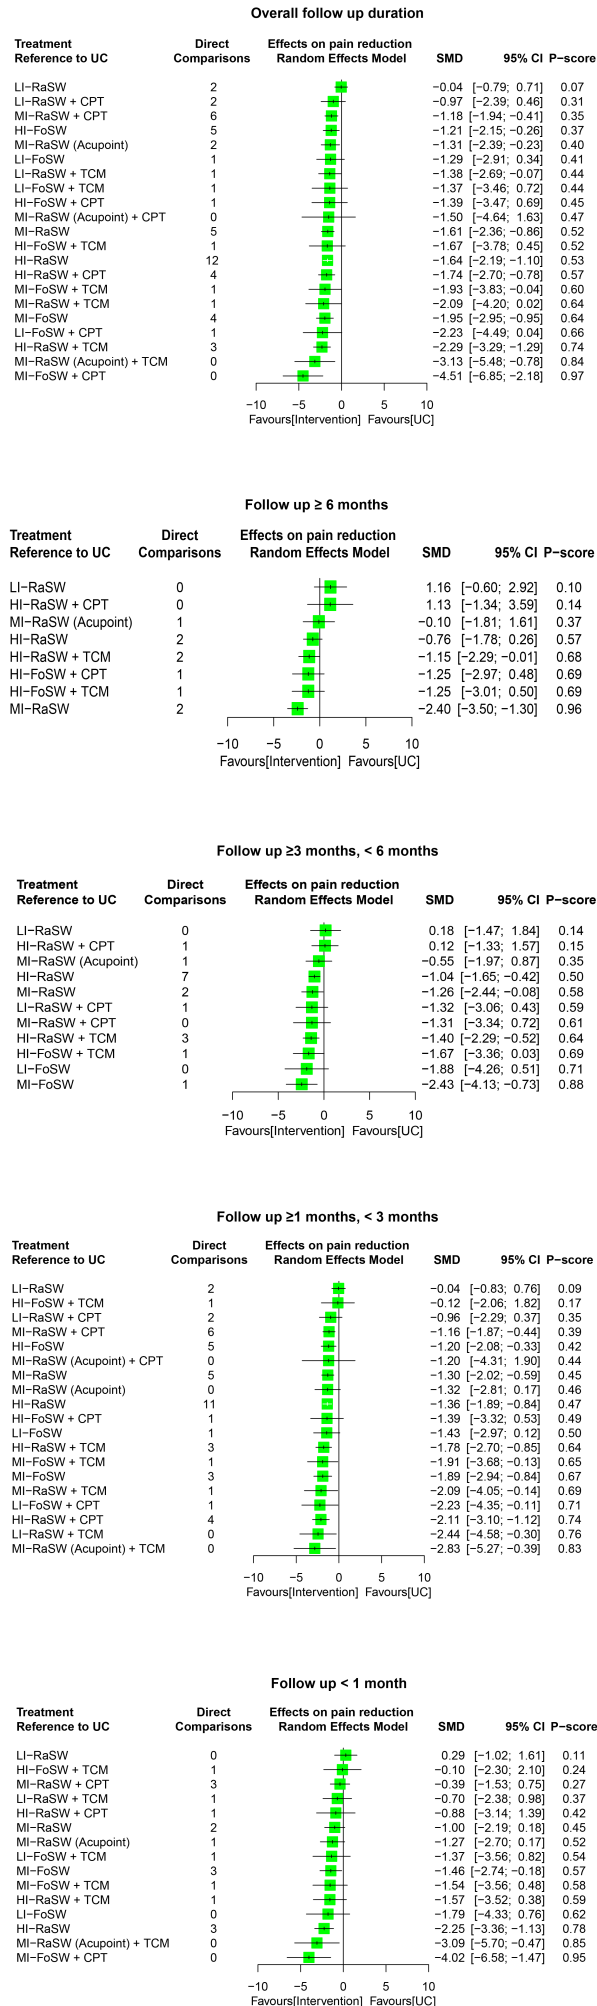

Figure S2

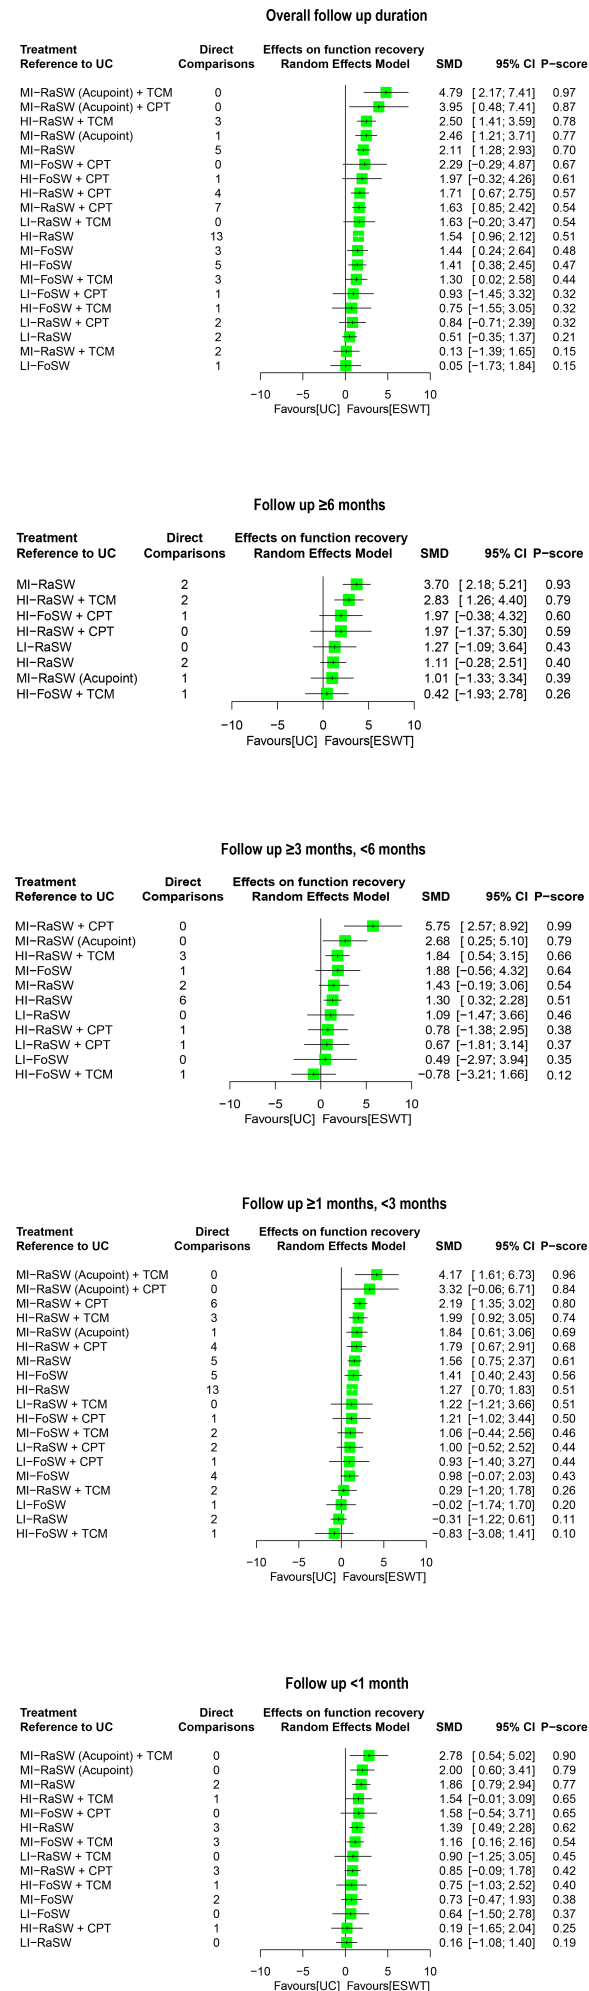

Figure S3

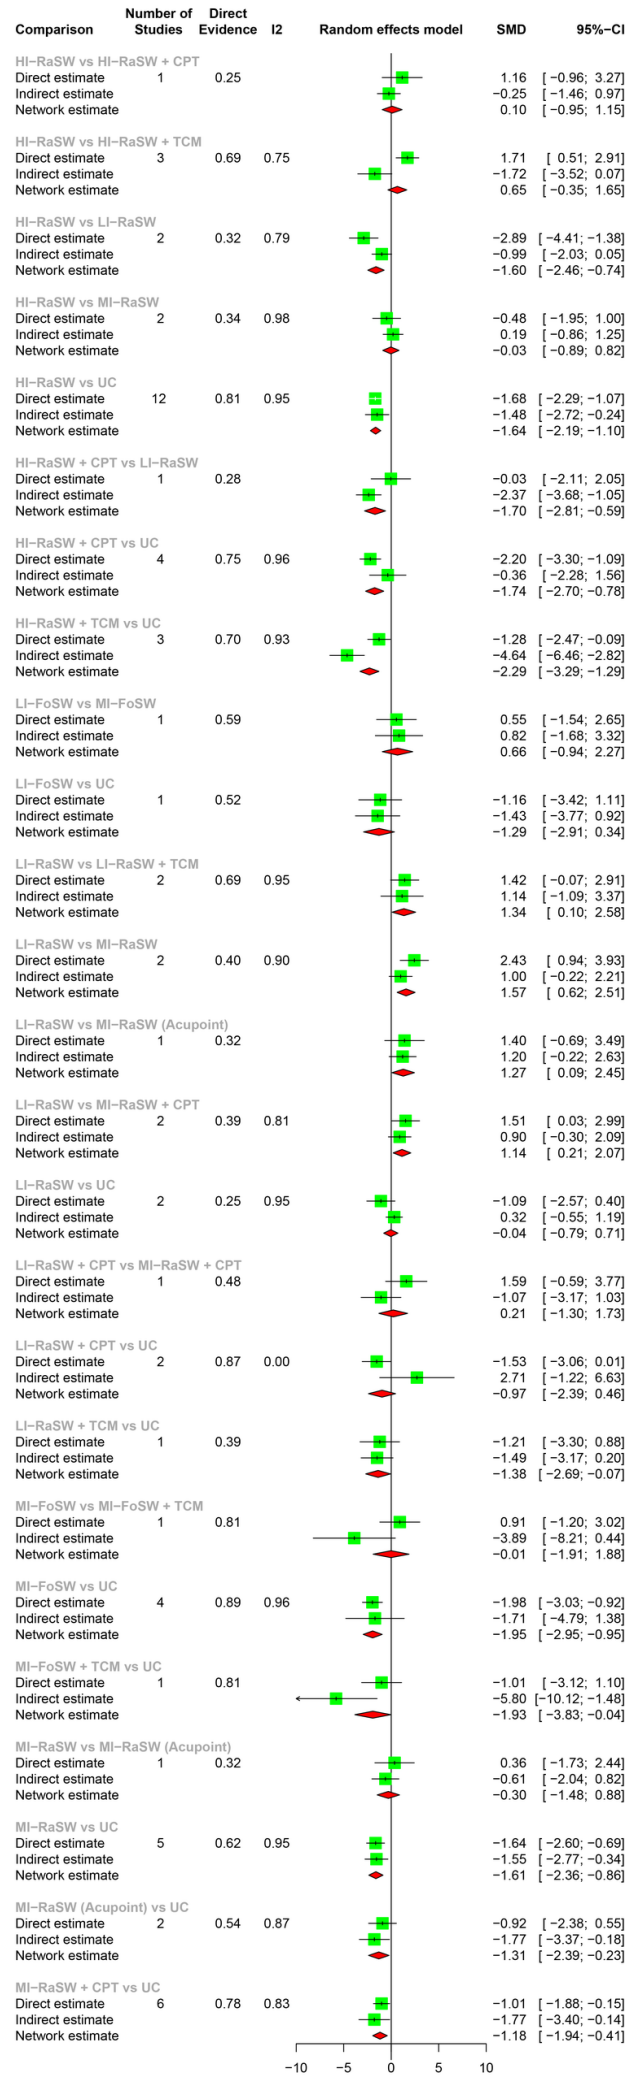

Figure S4

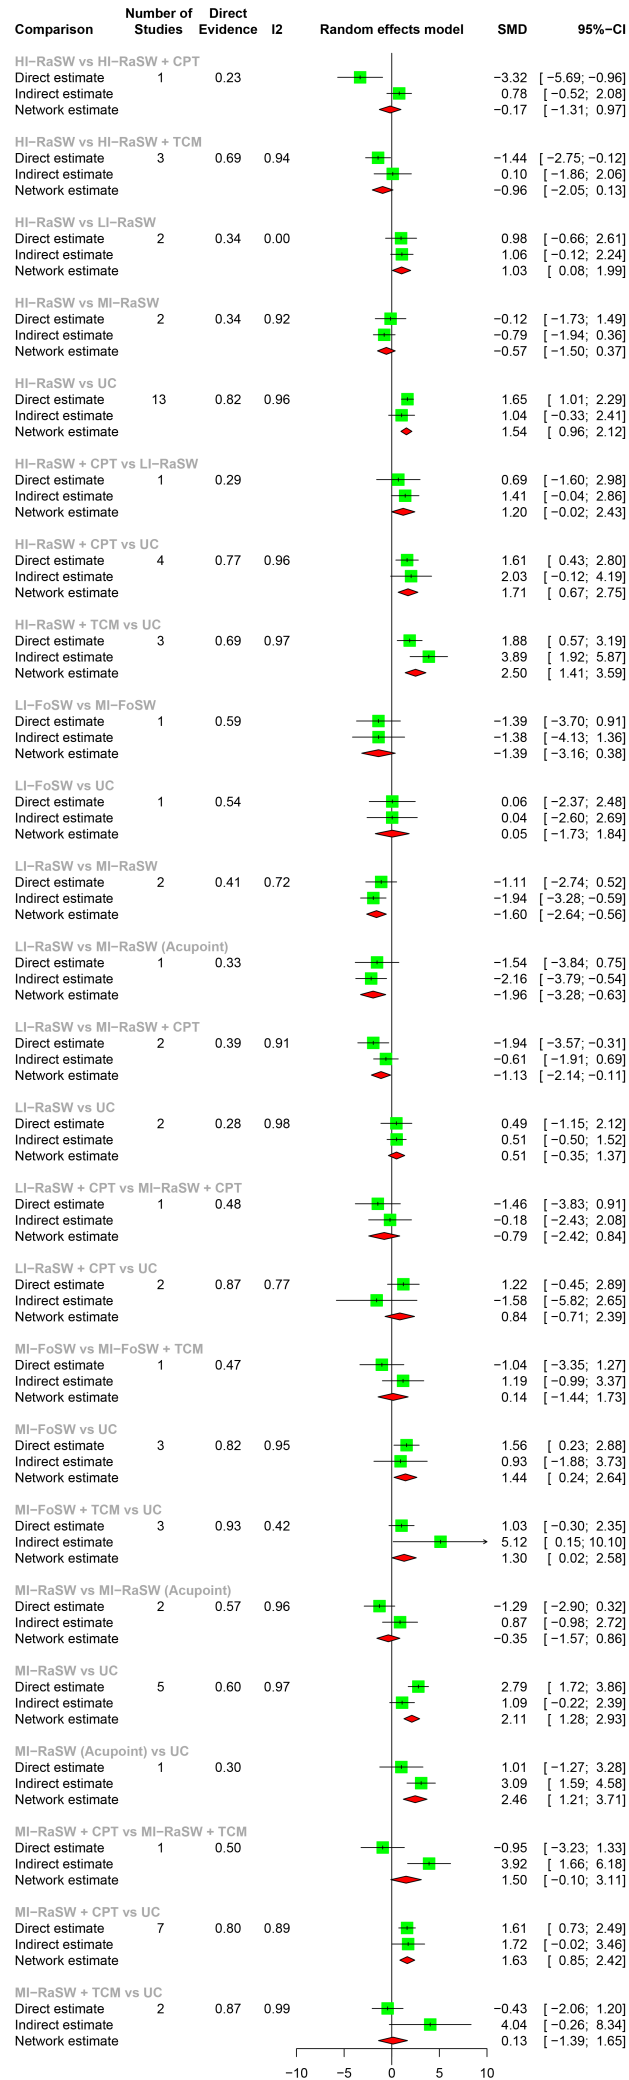

Figure S5

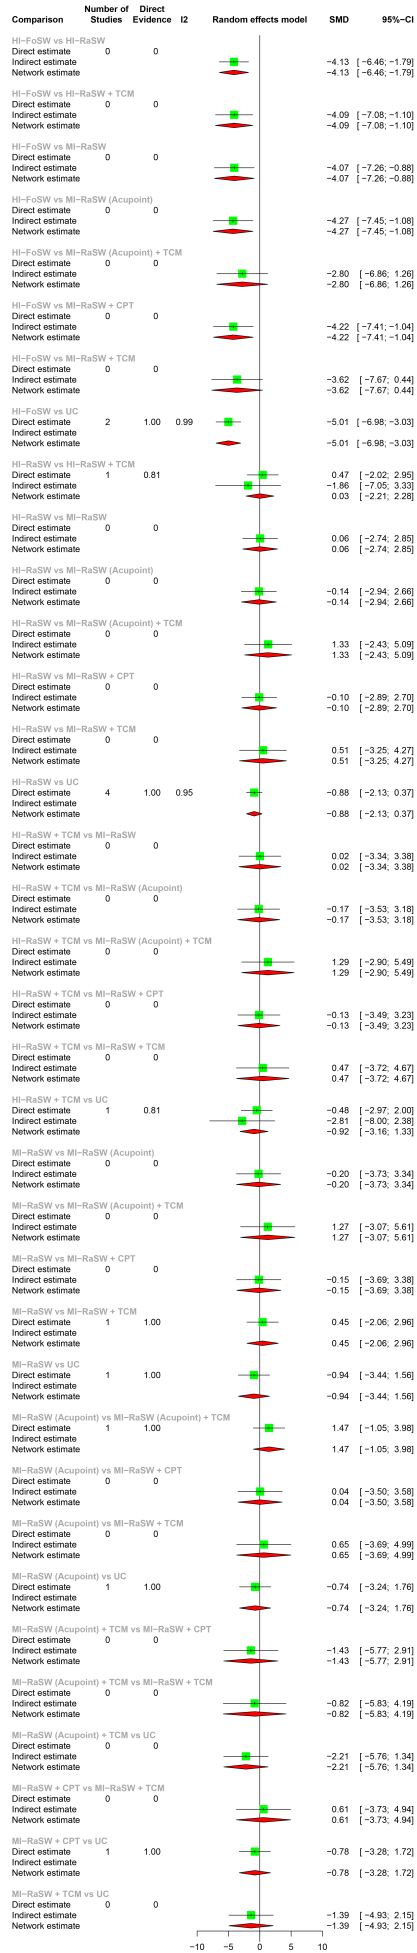

**Figure S6**

**(A) Pain**

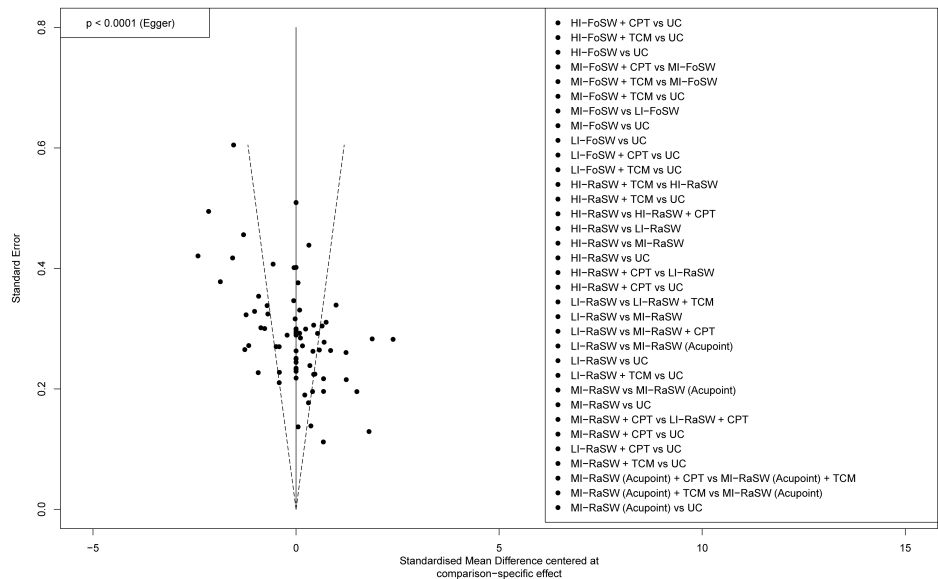

**(B) Global function**

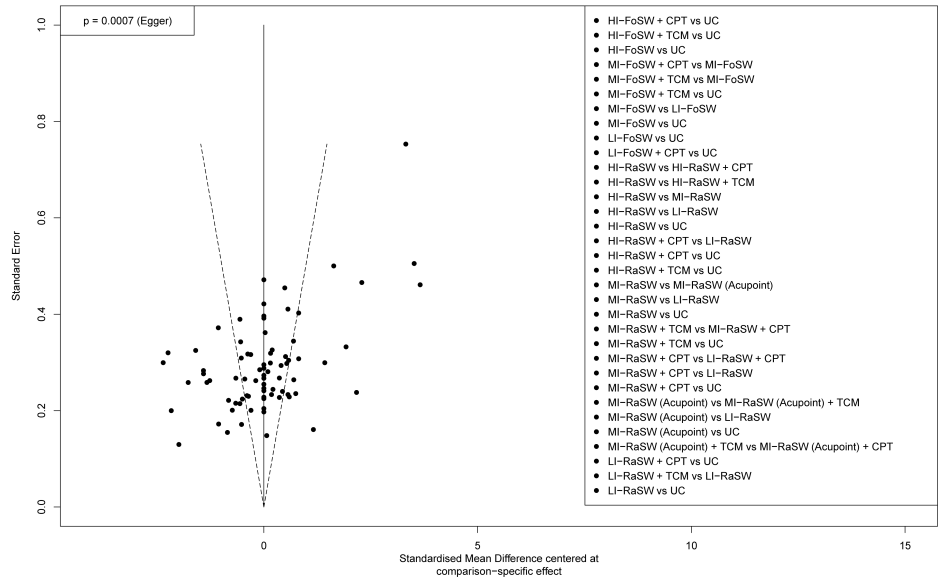

**(C) Disease inflammation**

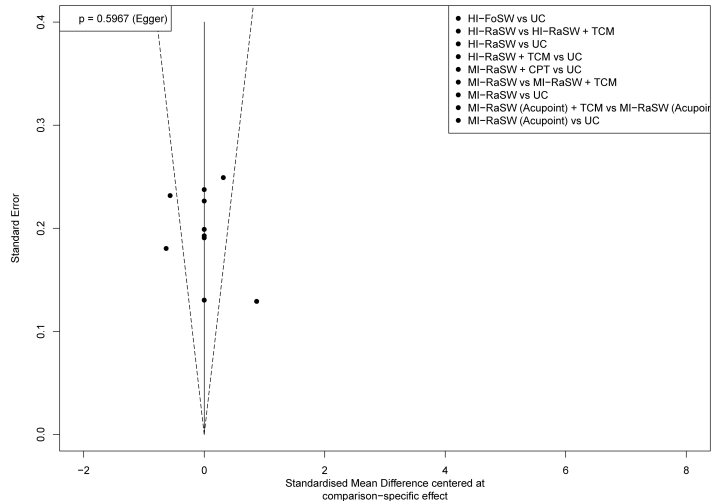

Supplement: s1 [file s1]
